# Supplementary material for: Trends in age at first hospital admission in relation to trends in life expectancy in Swedish men and women above the age of 60
Source: PubMed Central journal article supplement — BMJ Open. 2013 Sep 21;3(9):e003447. doi: 10.1136/bmjopen-2013-003447 (PMC3787478; doi:10.1136/bmjopen-2013-003447), 2013-09-21
Supplement: bmjopen-2013-003447.draft_revisions.pdf [file bmjopen-2013-003447.draft_revisions.pdf]

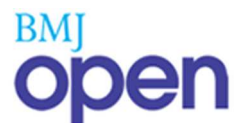

**Trends in age at first hospital admission in relation to trends in life expectancy in Swedish men and women above the age of 60**

|                                 |                                                                                                                                                                                                                                                                                                                                         |
|---------------------------------|-----------------------------------------------------------------------------------------------------------------------------------------------------------------------------------------------------------------------------------------------------------------------------------------------------------------------------------------|
| Journal:                        | <i>BMJ Open</i>                                                                                                                                                                                                                                                                                                                         |
| Manuscript ID:                  | bmjopen-2013-003447                                                                                                                                                                                                                                                                                                                     |
| Article Type:                   | Research                                                                                                                                                                                                                                                                                                                                |
| Date Submitted by the Author:   | 20-Jun-2013                                                                                                                                                                                                                                                                                                                             |
| Complete List of Authors:       | Karampampa, Korinna; Institute of Environmental Medicine, Epidemiology<br>Drefahl, Sven; Stockholm University, Sociology<br>Andersson, Tomas; Institute of Environmental Medicine, Epidemiology<br>Ahlbom, Anders; Institute of Environmental Medicine, Epidemiology<br>Modig, Karin; Institute of Environmental Medicine, Epidemiology |
| <b>Primary Subject Heading</b>: | Epidemiology                                                                                                                                                                                                                                                                                                                            |
| Secondary Subject Heading:      | Epidemiology, Public health                                                                                                                                                                                                                                                                                                             |
| Keywords:                       | hospital admission, trends, death, mortality, morbidity, Sweden                                                                                                                                                                                                                                                                         |
|                                 |                                                                                                                                                                                                                                                                                                                                         |

SCHOLARONE™  
Manuscripts

1  
2  
3 Trends in age at first hospital admission in relation to trends in life  
4  
5  
6 expectancy in Swedish men and women above the age of 60  
7  
8

9 Korinna Karampampa<sup>1</sup>, Sven Drefahl<sup>1,2</sup>, Tomas Anderson<sup>1,3</sup>, Anders Ahlbom<sup>1</sup>, Karin Modig<sup>1</sup>  
10  
11

12 <sup>1</sup> Institute of Environmental Medicine, Division of Epidemiology, Karolinska Institutet, Stockholm, Sweden  
13

14 <sup>2</sup> Department of Sociology, Demography Unit, Stockholm University, Stockholm, Sweden  
15

16 <sup>3</sup> Centre for Occupational and Environmental Medicine, Stockholm County Council, Stockholm, Sweden  
17  
18  
19  
20  
21

22 **Corresponding Author:**  
23

24 Korinna Karampampa  
25  
26

27 Institute of Environmental Medicine  
28  
29

30 Division of Epidemiology  
31  
32

33 Karolinska Institutet  
34  
35

36 Box 210  
37  
38

39 171 77 Stockholm, Sweden  
40  
41

42 Email: korinna.karampampa@ki.se  
43  
44

45 Tel: +46 704 33 74 15  
46  
47  
48

49 **Keywords:** Hospital admission, trends, death, mortality, morbidity, Sweden  
50  
51  
52  
53  
54  
55  
56  
57  
58  
59  
60

## Abstract

**Background:** The increase in life expectancy (LE) and the proportion of old people in the population raises the question whether the extended life is one in good or bad health. A potential challenge is that morbidity may not have declined in line with mortality leading to an increased demand for medical care and other societal consequences for example on the labour market. In the present study, we examined whether the first admission to hospital after the age of 60 has been postponed to higher ages between 1995 and 2010 for men and women in Sweden.

**Methods:** The entire Swedish population born between 1895 and 1950 was followed up between 1987 and 2010 with respect to hospital admissions and deaths using national registry data. Time from age 60 until the first hospital admission, and the remaining LE at age 60 were estimated.

**Results:** Between 1995 and 2010 both mortality and first hospital admission shifted to higher ages. The remaining LE at age 60, 70, and 80 increased for men and women. For the 90 year olds it was stable. The average time from age 60, 70, 80, and 90 until the first hospital admission increased at all ages.

**Conclusions:** In Sweden, the first hospital admission after the age of 60 has been pushed to higher ages in line with mortality for the ages 60 and above. First admission to the hospital could indicate the onset of first severe morbidity; however the re-organization of healthcare may also have influenced the observed trends.

## Article Summary

### Focus:

- The proportion of old people in the population has rapidly increased over the past years. The question of whether health has improved at a similar pace as life expectancy has become very important. Admission rates to the hospital over time provide important information in order to interpret changes in the health of the elderly.
- We examined whether the first hospital admission has been postponed to higher ages, for both men and women in Sweden; trends in the first admission to the hospital were compared to mortality trends.

### Key messages:

- The time at first hospital admission for men and women over the age of 60 in Sweden has been postponed to higher ages between 1995 and 2010, in line with the postponement of age at death for the same period.
- This result could probably be explained by a postponement of first severe morbidity to higher ages. Policy changes in the healthcare sector cannot be ruled out completely as a confounding factor.

### Strengths and limitations:

- A distinct advantage of our study is its nationwide coverage resulting in a large population without any selection bias. The longitudinal design allowed us to identify the first hospital admission and to follow individuals over time to estimate the hospitalization-free time from the age of 60.
- A limitation is that this study focuses on the time after the age of 60 until the first admission to the hospital, not taking into consideration subsequent events.

## INTRODUCTION

Life span has continuously increased for many countries including Sweden during the twentieth century[1] and even earlier. This trend was initiated by reductions in infant and child mortality; however, since the 1950s, most part of the mortality reduction was observed for older ages[2]. This has resulted in a rapid increase in the proportion of old individuals in the population[3]. In Sweden, the number of individuals that live to celebrate their 100<sup>th</sup> birthday has increased considerably from 1969 to 2009 (a 9-fold increase for men and a 18-fold increase for women)[4]. The question of whether health has improved at a similar pace as life expectancy has become very important. A potential challenge with an aging population is an increase in the number of individuals with chronic diseases, leading to an increased demand for medical care[5]. This scenario may however not be true if morbidity is postponed to higher ages in parallel with the increase in life expectancy[6].

Previous research has not reached consensus on how the health of the elderly has changed over time[7 8] mainly since health is a multidimensional concept measured by different indicators. In ageing research, measures of disability and functional limitations have been most commonly used[9]. Several studies have also examined incidence trends of major diseases among older individuals with different results[6 10-13], some diseases have declined[6 10 12] whereas some appear to have been stable or even increasing[13].

In addition to examining disease specific trends, overall admission rates to the hospital over time could be informative in order to interpret changes in the health and the healthcare over time. In the present study, we examined trends in first hospital admission after the age of 60 for the period 1987 to 2010, i.e. whether the first hospital admission has been postponed to higher ages, for both men and women in Sweden. Trends in the first admission to the hospital were compared to mortality trends.

## MATERIAL AND METHODS

### Study Cohort

The study cohort was created by linking the Register of the Total Population in Sweden with the National Inpatient Register, Cause of Death Register, and the Longitudinal Integration Database for Health Insurance and Labour Market Studies (LISA). All databases were linked using individuals' personal identification number. The linkage was conducted by Statistics Sweden and researchers received coded data.

The Swedish Register of the Total Population[14] has nation-wide coverage since 1968. It was used to collect information regarding the date of birth and migration status of individuals in the study cohort.

In order to minimize the risk of including individuals whose emigration or death has not been properly recorded in the Register of the Total Population, the LISA database[15] was used, which includes information about individuals' pensions and social transfers on an annual basis.

The National Inpatient Register[16] has nation-wide coverage since 1987 and was used to collect information about the inpatient care received by individuals living in Sweden from 1987 to 2010.

The Cause of Death Register[17] was used as to identify all deaths occurring inside or outside Sweden (for individuals registered in Sweden). Both the Cause of Death Register and the National Inpatient Register are maintained by The National Board of Health and Welfare.

### Setting

All men and women born between 1895 and 1950, living in Sweden in 1987, were included in the study cohort. They were followed for hospital admissions and deaths from 1987 to 2010. The

1  
2  
3 follow-up ended at whichever of the following dates occurred first; date of first hospital admission  
4  
5 after the age of 60, date of death, date of migration, or 31st December 2010.  
6  
7

## 8 **Statistical Analysis**

9

10  
11 The graphical representation of the study measures can be found in Figure 1.  
12

### 13 *Mortality*

14  
15  
16  
17 Period life tables were constructed for calendar years 1995 to 2010 to obtain the remaining life  
18  
19 expectancy, LE, and the expected distribution of deaths. Calculations were based on age-specific  
20  
21 death risks, estimated by dividing the number of deaths for each calendar year with the total number  
22  
23 of individuals at risk in that calendar year (i.e. population at the beginning of the calendar year).  
24

25  
26 The remaining LE at a given age, for each calendar year, was derived from the life table by dividing  
27  
28 the total number of person-years after a given age with the number of persons alive at that age. The  
29  
30 expected distribution of deaths was calculated by multiplying the age-specific death risk with the  
31  
32 probability of being alive at that age.  
33  
34

### 35 *First hospital admission*

36

37  
38  
39 First admission to the hospital was defined as the first admission after the age of 60 with a  
40  
41 minimum duration of two nights. Both fatal and non-fatal events were taken into account.  
42  
43

44  
45 Since the National Patient Register had complete national coverage first in 1987, it was not possible  
46  
47 to know whether individuals had any hospital admissions before 1987. Consequently, since we were  
48  
49 interested to capture the first admission to the hospital after the age of 60 that was independent of  
50  
51 any admissions happening before (i.e. we wanted to exclude re-admissions), we applied a 7-year  
52  
53 transition period that has been previously used by the Swedish National Board of Health and  
54  
55 Welfare in their calculations of incidence of myocardial infarction[18]. Thus, all individuals  
56  
57 hospitalized between 1987 and 1994 were excluded from the study population. In a next step we  
58  
59  
60

1  
2  
3 tested whether the 7-year period was sufficient by comparing the age-specific hospital admission  
4 rates using the longest possible follow up period, 23 years (from 2010 and back to 1987), and by  
5 restricting the follow up to 7 years (from 2010 to 2003). The calculations showed that a period of 7  
6 years was likely not long enough; the rate of admission appeared to be overestimated in the  
7 beginning of the period. In order to account for this overestimation, age-specific correction factors,  
8 derived from the comparison, were applied on the years 1995-2010. The correction factors weighted  
9 down the admission rates in the beginning of the follow-up period.  
10  
11  
12  
13  
14  
15  
16  
17  
18

19 Analyses of first hospital admission followed the same procedure as for deaths, using period life  
20 tables to estimate the time until the first admission to the hospital and the expected distribution of  
21 first hospitalizations. The age-specific risk of being admitted to the hospital for the first time after  
22 the age of 60 was calculated based on the number of admissions for each calendar year divided with  
23 the population at the beginning of the calendar year. The time at a given age until the first  
24 admission to the hospital, for each calendar year, was derived by dividing the total number of  
25 hospitalization-free person years after a given age with the number of persons without an admission  
26 to the hospital at that age. The expected distribution of first hospital admissions was calculated by  
27 multiplying the age-specific risk of being admitted to the hospital with the probability of being free  
28 of hospitalization at that age.  
29  
30  
31  
32  
33  
34  
35  
36  
37  
38  
39  
40  
41

42 The International Classification of Diseases (ICD) 9 and 10 was used to determine the causes of  
43 hospitalizations and deaths. All causes were taken into account.  
44  
45  
46

#### 47 *Sensitivity analyses*

48  
49

50 An admission to the hospital of a minimum duration of two nights was chosen for the analysis to  
51 ensure some degree of severity of a disease. In the sensitivity analysis we altered the minimum stay  
52 in the hospital from one to 16 nights to examine the impact our definition of hospital admission had  
53 on trends.  
54  
55  
56  
57  
58  
59  
60



1  
2  
3 In addition, to evaluate the impact on the trends from two major causes of hospitalizations and  
4 deaths, sensitivity analyses were made where we excluded all cardiovascular diseases, (CVD), and  
5 all malignancies respectively. CVD was defined as; ICD 9 codes: 340-359, ICD 10 codes: I00-I99.  
6  
7  
8  
9 Malignancies were defined as; ICD 9 codes: 140-206, ICD 10 codes: C00-C97.  
10

### 11 *Ethics Permission*

12  
13  
14  
15 An ethics approval for this study was obtained from the regional ethics committee in Stockholm,  
16  
17  
18 Dnr 2011/136-31/5.  
19  
20  
21  
22  
23  
24  
25  
26  
27  
28  
29  
30  
31  
32  
33  
34  
35  
36  
37  
38  
39  
40  
41  
42  
43  
44  
45  
46  
47  
48  
49  
50  
51  
52  
53  
54  
55  
56  
57  
58  
59  
60

## RESULTS

In Figure 2 (a-b) the expected distribution of deaths for the ages 60 to 100 is presented for four calendar years, 1995, 2000, 2005, and 2010, for men (a) and women (b). Corresponding results of the expected distribution of first hospital admissions for 60 to 100 year-old individuals, for the same calendar years, are shown in Figures 3a men and 3b women. Vertical lines show the remaining LE at age 60 and the time from age 60 until the first admission to the hospital for each calendar year.

For both men and women there has been a shift in mortality towards older ages over time, which is visible from the shift of the curves to the right (Figure 2 a-b). The remaining LE at the age of 60 increased from 21.3 years in 1995 to 24.0 years in 2010 for men and from 25.5 years to 27.0 years for women. A similar shift to higher ages between 1995 and 2010 was observed also for the first hospital admission, for both men and women (Figure 3 a-b). The time after the age of 60 until the first admission to the hospital increased from 12.2 to 14.0 years for men and for women from 13.9 to 15.9 years.

Whereas mortality curves appears to have become somewhat compressed over time (curves became narrower with a higher top), the ones representing first hospital admission seem to have shifted without being compressed.

In figures 4a and 4b, the remaining LE and the time until the first admission to the hospital are shown for different ages (60, but also for 70, 80, and 90 years) over time. For men, the remaining LE increased for all ages except for the 90 year olds where it remained rather stable. The time until first hospital admission increased for all ages, also for the 90-year olds (Figure 4a). For women, there was an increase in both the remaining LE and the time until first hospital admission for all age groups (Figure 4b). For both men and women the increase in remaining LE and time until first hospital admission was strongest for the 60- and 70-year olds as compared with the 80- and 90-year olds.

1  
2  
3 *Sensitivity analyses*  
4

5  
6 No changes in the first hospital admission trends were observed when we re-run the analyses  
7  
8 varying the number of days admitted to the hospital from 1 to 16 (results not shown but available  
9  
10 upon request).  
11

12  
13 Censoring all CVD as a cause of death from the overall mortality resulted in an increase of the  
14  
15 remaining LE at the age of 60 for both men and women and for all calendar years, but had no  
16  
17 impact on the shape of the trends, the curves still showed a similar shift. The same was true for  
18  
19 malignancies. Similarly with mortality, censoring CVD or malignancies from all causes of first  
20  
21 admission to the hospital had no impact on the trends, (results not shown but available upon  
22  
23 request).  
24  
25  
26  
27  
28  
29  
30  
31  
32  
33  
34  
35  
36  
37  
38  
39  
40  
41  
42  
43  
44  
45  
46  
47  
48  
49  
50  
51  
52  
53  
54  
55  
56  
57  
58  
59  
60

## DISCUSSION

The purpose of this study was to investigate time trends in the first admission to the hospital after the age of 60 in relation to mortality trends, for the period 1987 to 2010, for both men and women in Sweden. Results showed that there has been a shift towards older ages for the first hospital admission meaning that individuals live longer until their first hospital admission occurs. The same pattern was observed for mortality. For men, the remaining LE at the age of 60 increased more than the time from age 60 until the first hospitalization. For women the opposite was true. This means that the time after the first hospital admission until death has increased for men and decreased for women. For the ages 70, 80, and 90, the shift of the remaining LE and first hospital admission was larger for younger ages (70- year olds) compared to the oldest (80- and 90-year olds); results for men and women were similar at these ages.

A convenient interpretation of the shift of the first hospital admission to higher ages is that it represents a shift of morbidity. However, a more cautious interpretation requires consideration of the changes in the organization of healthcare in Sweden between 1987 and 2010. Such changes are for example the shift from inpatient to outpatient care for some diagnosis, and also changes in the length of stay once hospitalized over time (which however should not affect time to first hospital admission). Further, the number of hospital beds in Sweden has decreased over the same period[19]; however this could be a consequence of a more efficient healthcare, not necessarily affecting the likelihood of getting admitted to the hospital[19].

The Swedish National Board of Health and Welfare has published two reports regarding which diagnoses switched from treatment in an inpatient to an outpatient setting. They suggest that even though some diseases are now more commonly treated with day surgery in the outpatient care, very few diagnosis that were previously treated only with inpatient care, are now treated solely in an outpatient setting (such as cataract, glaucoma, and eye diseases in general)[20 21]. For diseases

1  
2  
3 related to the circulatory system (the majority among diagnoses in the inpatient care) the number of  
4  
5 surgery events in outpatient setting per admission in inpatient setting was 0,07 in 2010[21]. Thus –  
6  
7 even if a shift from inpatient to outpatient care for CVD would have taken place over the period, it  
8  
9 is very small. However, the reports present the total number of persons with the specific disease for  
10  
11 every year. Any changes in the age structure and size of the population seem not to have been taken  
12  
13 into account. Also, the proportions treated in outpatient surgery[21] are not given in age groups; it  
14  
15 may be that younger individuals are treated in an outpatient setting to a higher extent than older  
16  
17 individuals who are generally at higher risk of side effects. It is possible that over the period 1995 to  
18  
19 2010 some diseases have better control in primary/outpatient care therefore delaying admission to  
20  
21 inpatient care. Trends would then not necessarily mirror a healthier population but perhaps a  
22  
23 population that has postponed severe illness.  
24  
25  
26  
27

28 Regarding changes in the length of stay once hospitalized, the length of stay in hospitals in Sweden  
29  
30 decreased between the years 1995 and 2010[22]. The average hospital period (excluding geriatric  
31  
32 and psychiatric care) was 5.03 days in 1998 and 4.31 days in 2010, a 14.3% decrease[21]. This is  
33  
34 supported by a Danish study for the oldest-old, comparing hospitalizations in the cohort of 1895  
35  
36 with the cohort of 1905. The younger cohort had more frequent hospital admissions but a shorter  
37  
38 length of hospital stay[23]. To examine the impact of this possible bias we run a sensitivity analysis  
39  
40 varying the number of days admitted to the hospital from 1 to 16, but no changes in trends were  
41  
42 observed.  
43  
44  
45

46 To sum up, in favour of the first interpretation of the shift in trends of first hospital admission to  
47  
48 higher ages – a shift of first severe morbidity – is the decline in the incidence of important public  
49  
50 health diseases such as myocardial infarction and stroke[6 12]. Better control of diseases in primary  
51  
52 care setting, making the outcome of diseases less severe, could be another aspect that may have  
53  
54 contributed to this trend, allowing for a shift of the first admission to the hospital after the age of 60  
55  
56 to higher ages over time. Finally, since no changes in trends were observed when excluding two  
57  
58  
59  
60

1  
2  
3 major causes of hospital admissions and deaths for individuals over the age of 60, CVD and  
4 malignancies, the observed shift indicates a rather universal change in the onset of the use of  
5 inpatient care and deaths. However, a partial shift from inpatient care to outpatient care and a cut in  
6 the number of hospital beds in Sweden need to be taken into consideration when interpreting the  
7 trends.  
8  
9

10  
11  
12  
13  
14 A distinct advantage of our study is its nationwide coverage resulting in a large population without  
15 any selection bias. The longitudinal design allowed us to identify the first event and to follow  
16 individuals over time to estimate the hospitalization-free time from the age of 60.  
17  
18  
19

## 20 21 22 **CONCLUSION**

23  
24  
25 This study showed that the time at first hospital admission for men and women over the age of 60 in  
26 Sweden has been postponed to higher ages between 1995 and 2010. This was in line with the  
27 postponement of age at death for the same period. Men experienced a larger increase in remaining  
28 LE at age 60 than women. Men and women experienced a similar shift in time to first hospital  
29 admission. This result may be an indicator of a postponement of first severe morbidity to higher  
30 ages, even if policy changes in the healthcare sector cannot be ruled out completely as a  
31 confounding factor. Future research should look into trends of subsequent hospitalizations, and  
32 together with studies of incidence trends in major diseases, describe the overall health of the aging  
33 population.  
34  
35  
36  
37  
38  
39  
40  
41  
42  
43  
44

## 45 46 **CONTRIBUTIONS**

47  
48  
49 All authors - Korinna Karampampa (KK), Sven Drefahl (SD), Tomas Andersson (TA), Anders  
50 Ahlbom (AA), and Karin Modig (KM), were involved in the conception and design of the study.  
51 KK and TA performed the analysis of the data. All authors (KK, SD, TA, AA, and KM) were  
52 involved in the interpretation of the results. KK and KM drafted the manuscript and all authors  
53  
54  
55  
56  
57  
58  
59  
60

1  
2  
3 (including KK and KM) contributed with critical revisions to the contents of the manuscript. The  
4  
5 final version of the manuscript was approved from all authors (KK, SD, TA, AA, and KM).  
6  
7

## 8 **ACKNOWLEDGEMENTS**

9

10  
11 This work was supported by a grant from the Swedish council for working life and social research  
12  
13 [Forskningsrådet för arbetsliv och socialvetenskap, FAS] (grant number: 2011-0843). The regional  
14  
15 ethics committee in Stockholm [Regionala etikprövningsnämnden i Stockholm, EPN] provided an  
16  
17 approval for this study (Dnr 2011/136-31/5). There are no conflicts of interest in connection with  
18  
19 this paper.  
20  
21  
22  
23  
24  
25  
26  
27  
28  
29  
30  
31  
32  
33  
34  
35  
36  
37  
38  
39  
40  
41  
42  
43  
44  
45  
46  
47  
48  
49  
50  
51  
52  
53  
54  
55  
56  
57  
58  
59  
60

**REFERENCES**

1. Vaupel JW, Zhang Z, van Raalte AA. Life expectancy and disparity: an international comparison of life table data. *BMJ Open* 2011;1(1):e000128 doi: 10.1136/bmjopen-2011-000128[published Online First: Epub Date]].
2. Oeppen J, Vaupel JW. Demography. Broken limits to life expectancy. *Science* 2002;296(5570):1029-31 doi: 10.1126/science.1069675[published Online First: Epub Date]].
3. Bronnum-Hansen H, Petersen I, Jeune B, Christensen K. Lifetime according to health status among the oldest olds in Denmark. *Age Ageing* 2009;38(1):47-51 doi: 10.1093/ageing/afn239[published Online First: Epub Date]].
4. Drefahl S, Lundstrom H, Modig K, Ahlbom A. The era of centenarians: mortality of the oldest old in Sweden. *J Intern Med* 2012;272(1):100-2 doi: 10.1111/j.1365-2796.2012.02518.x[published Online First: Epub Date]].
5. Larsson K, Thorslund M. Chapter 8: old people's health. *Scand J Public Health Suppl* 2006;67:185-98 doi: 10.1080/14034950600677253[published Online First: Epub Date]].
6. Modig K, Drefahl S, Andersson T, Ahlbom A. The aging population in Sweden: can declining incidence rates in MI, stroke and cancer counterbalance the future demographic challenges? *Eur J Epidemiol* 2012;27(2):139-45 doi: 10.1007/s10654-012-9653-2[published Online First: Epub Date]].
7. Parker MG, Ahacic K, Thorslund M. Health changes among Swedish oldest old: prevalence rates from 1992 and 2002 show increasing health problems. *J Gerontol A Biol Sci Med Sci* 2005;60(10):1351-5
8. Thorslund M and Parker MG. Hur mår egentligen de äldre? *Lakartidningen*, 2005. 102(43):3119-24.



- 1  
2  
3 9. Crimmins EM, Beltran-Sanchez H. Mortality and morbidity trends: is there compression of  
4 morbidity? *J Gerontol B Psychol Sci Soc Sci* 2011;66(1):75-86 doi:  
5  
6 10.1093/geronb/gbq088[published Online First: Epub Date]].  
7  
8  
9  
10 10. Carandang R, Seshadri S, Beiser A, et al. Trends in incidence, lifetime risk, severity, and 30-day  
11 mortality of stroke over the past 50 years. *Jama* 2006;296(24):2939-46 doi:  
12 10.1001/jama.296.24.2939[published Online First: Epub Date]].  
13  
14  
15  
16 11. Langa KM, Larson EB, Karlawish JH, et al. Trends in the prevalence and mortality of cognitive  
17 impairment in the United States: is there evidence of a compression of cognitive morbidity?  
18 *Alzheimers Dement* 2008;4(2):134-44 doi: 10.1016/j.jalz.2008.01.001[published Online First: Epub  
19 Date]].  
20  
21  
22  
23  
24  
25 12. Peeters A, Nusselder WJ, Stevenson C, Boyko EJ, Moon L, Tonkin A. Age-specific trends in  
26 cardiovascular mortality rates in the Netherlands between 1980 and 2009. *Eur J Epidemiol*  
27 2011;26(5):369-73 doi: 10.1007/s10654-011-9546-9[published Online First: Epub Date]].  
28  
29  
30  
31  
32 13. Akushevich I, Kravchenko J, Ukraintseva S, Arbeev K, Yashin AI. Time trends of incidence of  
33 age-associated diseases in the US elderly population: medicare-based analysis. *Age Ageing* 2013  
34 doi: 10.1093/ageing/aft032[published Online First: Epub Date]].  
35  
36  
37  
38 14. Statistics Sweden [Statistiska centralbyrån]. Swedish Register of the Total Population [Registret  
39 över totalbefolkningen (RTB)]. Information available: [http://www.scb.se/Pages/List\\_257499.aspx](http://www.scb.se/Pages/List_257499.aspx).  
40  
41  
42  
43 15. Statistics Sweden [Statistiska centralbyrån]. Longitudinal Integration Database for Health  
44 Insurance and Labour Market Studies [Longitudinell integrationsdatabas för sjukförsäkrings- och  
45 arbetsmarknadsstudier] (LISA). Information available: [http://www.scb.se/Pages/List\\_257742.aspx](http://www.scb.se/Pages/List_257742.aspx)  
46  
47  
48  
49  
50  
51 16. Socialstyrelsen [National Board of Health and Welfare]. National Inpatient Register  
52 [Patientregistret]. Information available:  
53  
54 <http://www.socialstyrelsen.se/register/halsodataregister/patientregistret>.  
55  
56  
57  
58  
59  
60

- 1  
2  
3 17. Socialstyrelsen [National Board of Health and Welfare]. Cause of Death Register  
4 [Dödsorsaksregistret]. Information available:  
5  
6 <http://www.socialstyrelsen.se/register/dodsorsaksregistret>.  
7  
8  
9 18. Socialstyrelsen [National Board of Health and Welfare]. Publications 2011. Hjärtinfarkter  
10 1987–2010 [Myocardial infarctions in Sweden ,1987–2010] Available:  
11 <http://www.socialstyrelsen.se/publikationer2011/2011-11-36>. Accessed: 05 September 2012.  
12  
13  
14 19. Landsting SKo. Från sjukhussäng till e-hälsa. Utvecklingstendenser inom hälso- och  
15 sjukvården. Stockholm: Sveriges kommuner och landsting., 2010.  
16  
17  
18 20. Socialstyrelsen [National Board of Health and Welfare]. Publications 2012. Inpatient diseases in  
19 Sweden 1987–2010 [Sjukdomar i slutenvård 1987- 2010]. Secondary Inpatient diseases in Sweden  
20 1987–2010 [Sjukdomar i slutenvård 1987- 2010] Available:  
21 <http://www.socialstyrelsen.se/publikationer2012/2012-5-25>. Accessed: 16 November 2012.  
22  
23  
24 21. Socialstyrelsen [National Board of Health and Welfare]. Publications 2012. Patientregistret för  
25 2010 ur ett DRG-perspektiv [National In-patient Care Register in 2010, from a DRG perspective].  
26 Available: <http://www.socialstyrelsen.se/Lists/Artikelkatalog/Attachments/18724/2012-5-25.pdf>.  
27 Accessed: 16 November 2012.  
28  
29  
30 22. Organization for Economic Co-operation and Development (OECD). OECD statistics. OECD  
31 Health Data: Health care utilisation: *Average length of stay: in-patient care*. Available:  
32 <http://stats.oecd.org/> Accessed: 07 June 2013.  
33  
34  
35 23. Oksuzyan A, Jeune B, Juel K, Vaupel JW, Christensen K. Changes in hospitalisation and  
36 surgical procedures among the oldest-old: a follow-up study of the entire Danish 1895 and 1905  
37 cohorts from ages 85 to 99 years. *Age Ageing*. 2013 Mar 26. [Epub ahead of print]  
38  
39  
40  
41  
42  
43  
44  
45  
46  
47  
48  
49  
50  
51  
52  
53  
54  
55  
56  
57  
58  
59  
60

## Figures

**Fig. 1** Description of study measures.

**Fig. 2** Distribution of all-cause mortality, (a) for men and (b) for women, for four calendar years, ages 60-100. Vertical lines present the remaining life expectancy, LE, at age 60 for the same calendar years.

**Fig. 3** Distribution of all-cause first hospital admission, (a) for men and (b) for women, for four calendar years, ages 60-100. Vertical lines present the time to first hospital admission after the age of 60 for the same calendar years.

**Fig. 4** Remaining life-expectancy (LE) and time to first admission to the hospital after the ages of 60, 70, 80, and 90, (a) for men and (b) for women.

1  
2  
3  
4  
5  
6  
7  
8  
9  
10  
11  
12  
13  
14  
15  
16  
17  
18  
19  
20  
21  
22  
23  
24  
25  
26  
27  
28  
29  
30  
31  
32  
33  
34  
35  
36  
37  
38  
39  
40  
41  
42  
43  
44  
45  
46  
47  
48  
49  
50  
51  
52  
53  
54  
55  
56  
57  
58  
59  
60

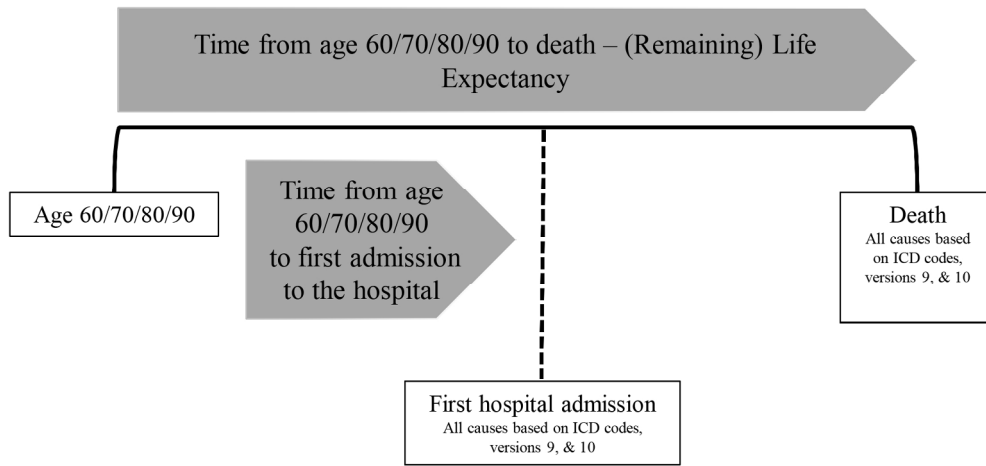

Description of study measures.  
177x84mm (300 x 300 DPI)

er review only

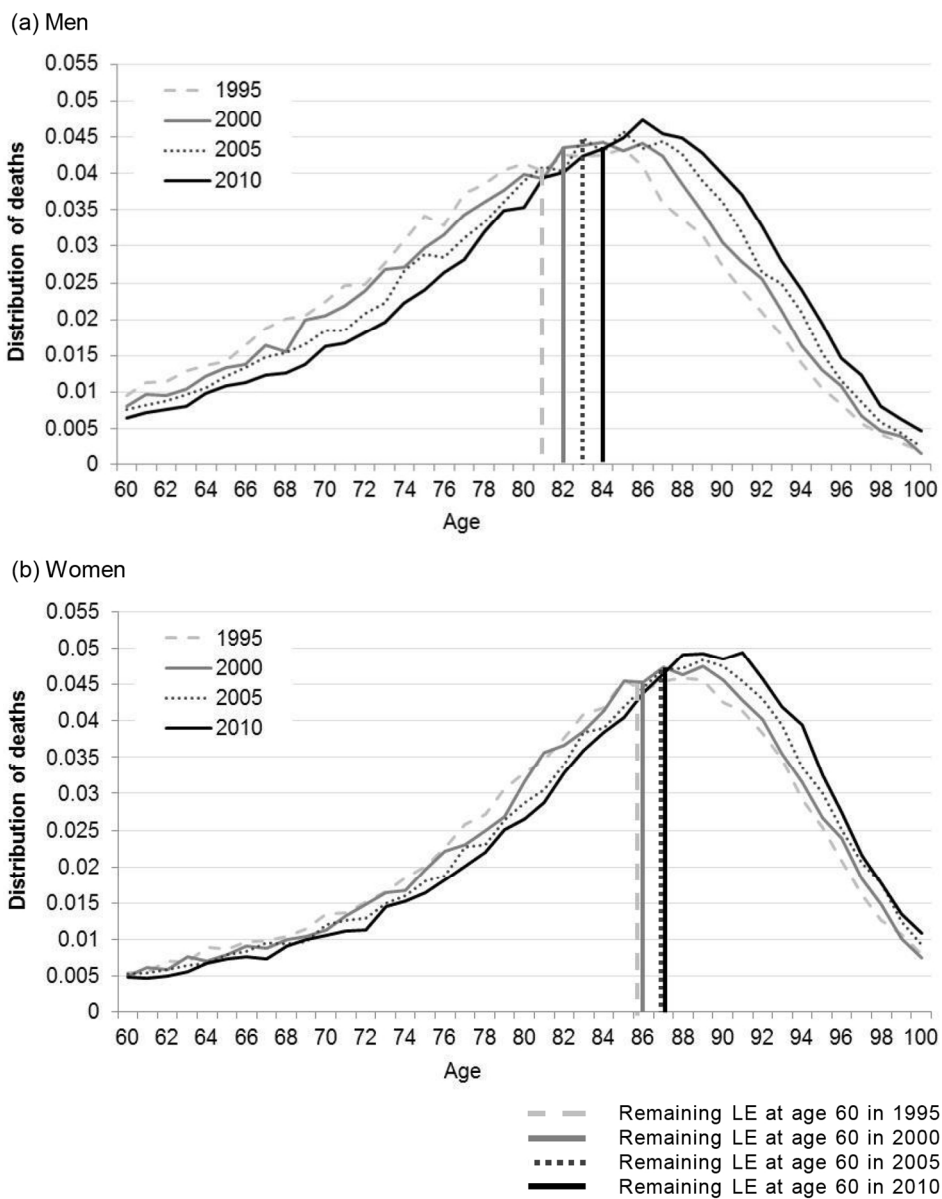

Distribution of all-cause mortality, (a) for men and (b) for women, for four calendar years, ages 60-100. Vertical lines present the remaining life expectancy, LE, at age 60 for the same calendar years. 131x166mm (300 x 300 DPI)

1  
2  
3  
4  
5  
6  
7  
8  
9  
10  
11  
12  
13  
14  
15  
16  
17  
18  
19  
20  
21  
22  
23  
24  
25  
26  
27  
28  
29  
30  
31  
32  
33  
34  
35  
36  
37  
38  
39  
40  
41  
42  
43  
44  
45  
46  
47  
48  
49  
50  
51  
52  
53  
54  
55  
56  
57  
58  
59  
60

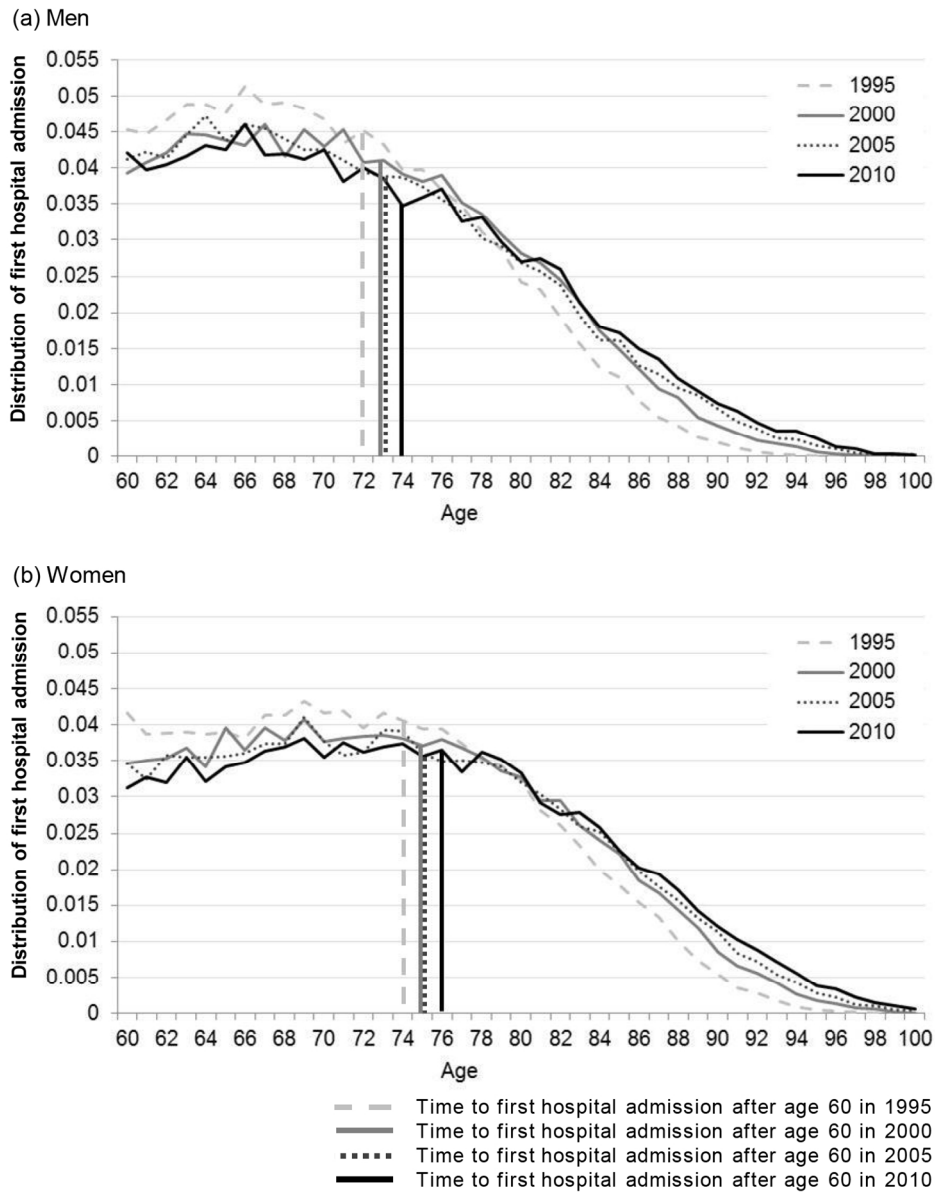

Distribution of all-cause first hospital admission, (a) for men and (b) for women, for four calendar years, ages 60-100. Vertical lines present the time to first hospital admission after the age of 60 for the same calendar years.  
132x168mm (300 x 300 DPI)

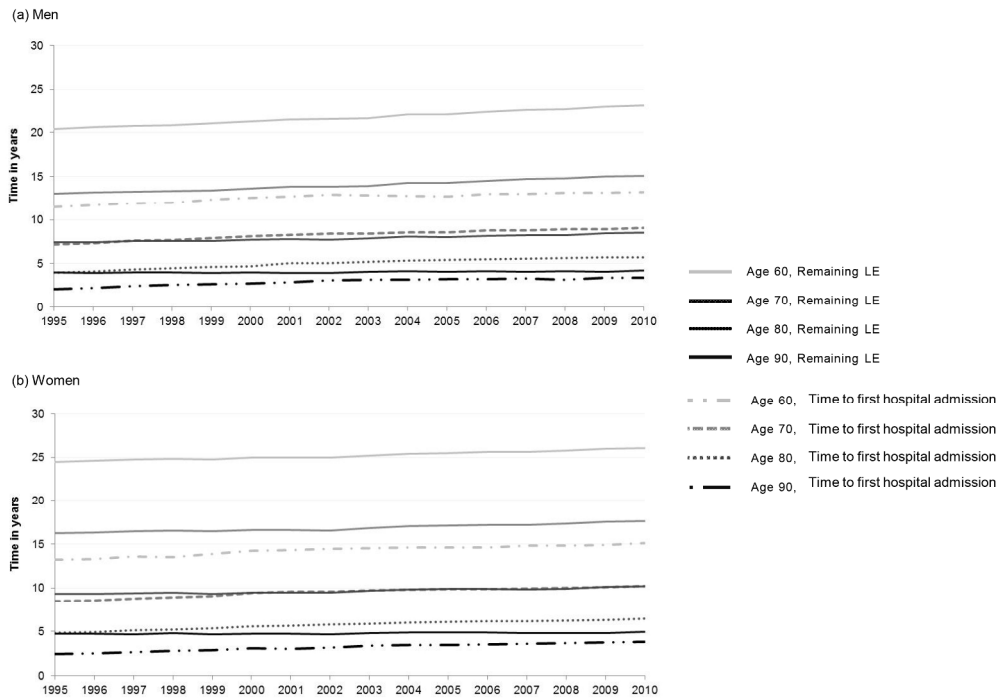

Remaining life-expectancy (LE) and time to first admission to the hospital after the ages of 60, 70, 80, and 90, (a) for men and (b) for women.  
233x163mm (300 x 300 DPI)

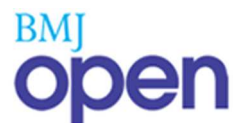

**Trends in age at first hospital admission in relation to trends in life expectancy in Swedish men and women above the age of 60**

|                                 |                                                                                                                                                                                                                                                                                                                                         |
|---------------------------------|-----------------------------------------------------------------------------------------------------------------------------------------------------------------------------------------------------------------------------------------------------------------------------------------------------------------------------------------|
| Journal:                        | <i>BMJ Open</i>                                                                                                                                                                                                                                                                                                                         |
| Manuscript ID:                  | bmjopen-2013-003447.R1                                                                                                                                                                                                                                                                                                                  |
| Article Type:                   | Research                                                                                                                                                                                                                                                                                                                                |
| Date Submitted by the Author:   | 15-Aug-2013                                                                                                                                                                                                                                                                                                                             |
| Complete List of Authors:       | Karampampa, Korinna; Institute of Environmental Medicine, Epidemiology<br>Drefahl, Sven; Stockholm University, Sociology<br>Andersson, Tomas; Institute of Environmental Medicine, Epidemiology<br>Ahlbom, Anders; Institute of Environmental Medicine, Epidemiology<br>Modig, Karin; Institute of Environmental Medicine, Epidemiology |
| <b>Primary Subject Heading</b>: | Epidemiology                                                                                                                                                                                                                                                                                                                            |
| Secondary Subject Heading:      | Epidemiology, Public health                                                                                                                                                                                                                                                                                                             |
| Keywords:                       | hospital admission, trends, death, mortality, morbidity, Sweden                                                                                                                                                                                                                                                                         |
|                                 |                                                                                                                                                                                                                                                                                                                                         |

SCHOLARONE™  
Manuscripts



1  
2  
3 Trends in age at first hospital admission in relation to trends in life  
4  
5  
6 expectancy in Swedish men and women above the age of 60  
7  
8

9 Korinna Karampampa<sup>1</sup>, Sven Drefahl<sup>1,2</sup>, Tomas Anderson<sup>1,3</sup>, Anders Ahlbom<sup>1</sup>, Karin Modig<sup>1</sup>  
10  
11

12 <sup>1</sup> Institute of Environmental Medicine, Division of Epidemiology, Karolinska Institutet, Stockholm, Sweden  
13

14 <sup>2</sup> Department of Sociology, Demography Unit, Stockholm University, Stockholm, Sweden  
15

16 <sup>3</sup> Centre for Occupational and Environmental Medicine, Stockholm County Council, Stockholm, Sweden  
17  
18  
19  
20  
21

22 **Corresponding Author:**  
23

24 Korinna Karampampa  
25  
26

27 Institute of Environmental Medicine  
28  
29

30 Division of Epidemiology  
31  
32

33 Karolinska Institutet  
34  
35

36 Box 210  
37  
38

39 171 77 Stockholm, Sweden  
40  
41

42 Email: korinna.karampampa@ki.se  
43  
44

45 Tel: +46 704 33 74 15  
46  
47  
48

49 **Keywords:** Hospital admission, trends, death, mortality, morbidity, Sweden  
50  
51  
52  
53  
54  
55  
56  
57  
58  
59  
60

## Abstract

**Objectives:** To examine whether the first admission to hospital after the age of 60 has been postponed to higher ages for men and women in Sweden, in line with the shift in mortality.

**Design:** This nation-wide observational study was based on data obtained from national registries in Sweden. The study cohort was created by linking the Register of the Total Population in Sweden with the National Inpatient Register and the Cause of Death Register.

**Setting:** The entire Swedish population born between 1895 and 1950 was followed up between 1987 and 2010 with respect to hospital admissions and deaths using the national registry data.

**Primary outcome measures:** Time from age 60 until the first admission to the hospital, regardless of diagnose, and the time from age 60 until death (remaining life expectancy, LE) were estimated for the years 1995 to 2010. The difference between these two measures was also estimated for the same period.

**Results:** Between 1995 and 2010 both mortality and first hospital admission shifted to higher ages. The average time from age 60, 70, 80, and 90 until the first hospital admission increased at all ages. The remaining LE at age 60, 70, and 80 increased for men and women. For the 90 year olds it was stable.

**Conclusions:** In Sweden, the first hospital admission after the age of 60 has been pushed to higher ages in line with mortality for the ages 60 and above. First admission to the hospital could indicate the onset of first severe morbidity; however the re-organization of healthcare may also have influenced the observed trends.

## Article Summary

### Focus:

- The proportion of old people in the population has rapidly increased over the past years. The question of whether health has improved at a similar pace as life expectancy has become very important. Admission rates to the hospital over time provide important information in order to interpret changes in the health of the elderly.
- We examined whether the first hospital admission after the age of 60 has been postponed to higher ages, for both men and women in Sweden; trends in the first admission to the hospital were compared to mortality trends.

### Key messages:

- The time at first hospital admission for men and women over the age of 60 in Sweden has been postponed to higher ages between 1995 and 2010, in line with the postponement of age at death for the same period.
- This result could probably be explained by a postponement of first severe morbidity to higher ages. Policy changes in the healthcare sector cannot be ruled out completely as a confounding factor.

### Strengths and limitations:

- A distinct advantage of our study is its nationwide coverage resulting in a large population without any selection bias. The longitudinal design allowed us to identify the first hospital admission and to follow individuals over time to estimate the hospitalization-free time from the age of 60.

- 1
  - 2
  - 3
  - 4
  - 5
  - 6
  - 7
  - 8
  - 9
  - 10
  - 11
  - 12
  - 13
  - 14
  - 15
  - 16
  - 17
  - 18
  - 19
  - 20
  - 21
  - 22
  - 23
  - 24
  - 25
  - 26
  - 27
  - 28
  - 29
  - 30
  - 31
  - 32
  - 33
  - 34
  - 35
  - 36
  - 37
  - 38
  - 39
  - 40
  - 41
  - 42
  - 43
  - 44
  - 45
  - 46
  - 47
  - 48
  - 49
  - 50
  - 51
  - 52
  - 53
  - 54
  - 55
  - 56
  - 57
  - 58
  - 59
  - 60
- A limitation is that this study focuses on the time after the age of 60 until the first admission to the hospital, not taking into consideration subsequent events.

For peer review only

## INTRODUCTION

Life span has continuously increased for many countries including Sweden during the twentieth century [1] and even earlier. This trend was initiated by reductions in infant and child mortality; however, since the 1950s, most part of the mortality reduction was observed for older ages [2]. This has resulted in a rapid increase in the proportion of old individuals in the population [3]. In Sweden, the number of individuals that live to celebrate their 100<sup>th</sup> birthday has increased considerably from 1969 to 2009 (a 9-fold increase for men and a 18-fold increase for women) [4]. The question of whether health has improved at a similar pace as life expectancy has become very important. Has morbidity decreased faster than mortality (compression of morbidity [5]), slower than mortality (expansion of morbidity [6]), or at the same pace as mortality (relative compression of morbidity [7])? A potential challenge with an aging population is an increase in the number of individuals with chronic diseases, leading to an increased demand for medical care [8]. This scenario may however not be true if morbidity is postponed to higher ages in parallel with the increase in life expectancy [9].

Previous research has not reached consensus on how the health of the elderly has changed over time [10 11] mainly since health is a multidimensional concept measured by different indicators. In ageing research, measures of disability and functional limitations have been most commonly used [12]. Several studies have also examined incidence trends of major diseases among older individuals with different results [9 13-16], some diseases have declined [9 13 15] whereas some appear to have been stable or even increasing [16].

In addition to examining disease specific trends, overall admission rates to the hospital over time could be informative in order to interpret changes in the health and the healthcare over time. In the present study, we examined trends in first hospital admission after the age of 60 for the period 1987 to 2010, i.e. whether the first hospital admission has been postponed to higher ages, for both men

1  
2  
3 and women in Sweden. Trends in the first admission to the hospital were compared to mortality  
4 trends.  
5  
6  
7  
8  
9

## 10 11 **MATERIAL AND METHODS**

### 12 13 14 **Study Cohort**

15  
16  
17 The study cohort was created by linking the Register of the Total Population in Sweden with the  
18 National Inpatient Register, Cause of Death Register, and the Longitudinal Integration Database for  
19 Health Insurance and Labour Market Studies (LISA). In Sweden, all individuals have a unique  
20 personal identification number, which makes it possible to identify them in all registries. All  
21 databases were linked using this personal identification number. The linkage was conducted by  
22 Statistics Sweden and the researchers received de-identified data sources with a reference number  
23 (unique for each individual) instead of the personal identification number.  
24  
25  
26  
27  
28  
29  
30  
31  
32

33 The Swedish Register of the Total Population [17] has nation-wide coverage since 1968. It was  
34 used to collect information regarding the date of birth and migration status of individuals in the  
35 study cohort.  
36  
37  
38  
39

40 In order to minimize the risk of including individuals whose emigration or death has not been  
41 properly recorded in the Register of the Total Population, the LISA database [18] was used, which  
42 includes information about individuals' pensions and social transfers on an annual basis.  
43  
44  
45  
46  
47

48 The National Inpatient Register [19] has nation-wide coverage since 1987 and was used to collect  
49 information about the inpatient care received by individuals living in Sweden from 1987 to 2010.  
50  
51  
52  
53  
54  
55  
56  
57  
58  
59  
60

1  
2  
3 The Cause of Death Register [20] was used as to identify all deaths occurring inside or outside  
4  
5 Sweden (for individuals registered in Sweden). Both the Cause of Death Register and the National  
6  
7 Inpatient Register are maintained by The National Board of Health and Welfare.  
8  
9

### 10 **Setting**

11  
12  
13 All men and women above the age of 60 that were born between 1895 and 1950 and were living in  
14  
15 Sweden in 1987 were included in the study cohort. They were followed for hospital admissions and  
16  
17 deaths from 1987 to 2010. The follow-up ended at whichever of the following dates occurred first;  
18  
19 date of first hospital admission after the age of 60, date of death, date of migration, or 31st  
20  
21 December 2010.  
22  
23

### 24 **Statistical Analysis**

25  
26  
27  
28 The graphical representation of the study measures can be found in Figure 1.  
29  
30

#### 31 *Mortality*

32  
33  
34 Period life tables were constructed for calendar years 1995 to 2010 to obtain the remaining life  
35  
36 expectancy, LE, and the expected distribution of deaths. Calculations were based on age-specific  
37  
38 death risks, estimated by dividing the number of deaths for each calendar year with the total number  
39  
40 of individuals at risk in that calendar year (i.e. population at the beginning of the calendar year).  
41  
42 The remaining LE at a given age, for each calendar year, was derived from the life table by dividing  
43  
44 the total number of person-years after a given age with the number of persons alive at that age. The  
45  
46 expected distribution of deaths was calculated by multiplying the age-specific death risk with the  
47  
48 probability of being alive at that age.  
49  
50

#### 51 *First hospital admission*

1  
2  
3 First admission to the hospital was defined as the first admission after the age of 60 with a  
4  
5 minimum duration of two nights. Both fatal and non-fatal events were taken into account.  
6  
7

8 Since the National Patient Register had complete national coverage first in 1987, it was not possible  
9  
10 to know whether individuals had any hospital admissions before 1987. Consequently, since we were  
11  
12 interested to capture the first admission to the hospital after the age of 60 that was independent of  
13  
14 any admissions happening before (i.e. we wanted to exclude re-admissions), we applied a 7-year  
15  
16 transition period that has been previously used by the Swedish National Board of Health and  
17  
18 Welfare in their calculations of incidence of myocardial infarction [21]. Thus, all individuals  
19  
20 hospitalized between 1987 and 1994 were excluded from the study population. In a next step we  
21  
22 tested whether the 7-year period was sufficient by comparing the age-specific hospital admission  
23  
24 rates using the longest possible follow up period, 23 years (from 2010 and back to 1987), and by  
25  
26 restricting the follow up to 7 years (from 2010 to 2003). The calculations showed that a period of 7  
27  
28 years was likely not long enough; the rate of admission appeared to be overestimated in the  
29  
30 beginning of the period. In order to account for this overestimation, age-specific correction factors,  
31  
32 derived from the comparison, were applied on the years 1995-2010. The correction factors weighted  
33  
34 down the admission rates in the beginning of the follow-up period.  
35  
36  
37  
38  
39

40 Analyses of first hospital admission followed the same procedure as for deaths, using period life  
41  
42 tables to estimate the time until the first admission to the hospital and the expected distribution of  
43  
44 first hospitalizations. The age-specific risk of being admitted to the hospital for the first time after  
45  
46 the age of 60 was calculated based on the number of admissions for each calendar year divided with  
47  
48 the population at the beginning of the calendar year. The time at a given age until the first  
49  
50 admission to the hospital, for each calendar year, was derived by dividing the total number of  
51  
52 hospitalization-free person years after a given age with the number of persons without an admission  
53  
54 to the hospital at that age. The expected distribution of first hospital admissions was calculated by  
55  
56  
57  
58  
59  
60



1  
2  
3 multiplying the age-specific risk of being admitted to the hospital with the probability of being free  
4  
5 of hospitalization at that age.  
6

7  
8 The International Classification of Diseases (ICD) 9 and 10 was used to determine the causes of  
9  
10 hospitalizations and deaths. All causes were taken into account.  
11

### 12 13 *Sensitivity analyses* 14

15  
16 An admission to the hospital of a minimum duration of two nights was chosen for the analysis to  
17  
18 ensure some degree of severity of a disease. In the sensitivity analysis we altered the minimum stay  
19  
20 in the hospital between one and 16 nights to examine the impact our definition of hospital  
21  
22 admission had on the trends. After a careful examination of our data, we observed that hospital  
23  
24 stays that were longer than 16 nights were rare. Therefore we chose to vary the minimum stay in the  
25  
26 hospital between one and sixteen nights.  
27  
28

29  
30 In addition, to evaluate the impact on the trends from two major causes of hospitalizations and  
31  
32 deaths, sensitivity analyses were made where we excluded all cardiovascular diseases, (CVD), and  
33  
34 all malignancies respectively. CVD was defined as; ICD 9 codes: 340-359, ICD 10 codes: I00-I99.  
35  
36 Malignancies were defined as; ICD 9 codes: 140-206, ICD 10 codes: C00-C97.  
37  
38

### 39 40 *Ethics Permission* 41

42  
43 An ethics approval for this study was obtained from the regional ethics committee in Stockholm,  
44  
45 Dnr 2011/136-31/5.  
46  
47  
48  
49  
50  
51  
52  
53  
54  
55  
56  
57  
58  
59  
60

## RESULTS

In Figure 2 (a-b) the expected distribution of deaths for the ages 60 to 100 is presented for four calendar years, 1995, 2000, 2005, and 2010, for men (a) and women (b). Corresponding results of the expected distribution of first hospital admissions for 60 to 100 year-old individuals, for the same calendar years, are shown in Figures 3a men and 3b women. Vertical lines show the remaining LE at age 60 and the time from age 60 until the first admission to the hospital for each calendar year.

For both men and women there has been a shift in mortality towards older ages over time, which is visible from the shift of the curves to the right (Figure 2 a-b). The remaining LE at the age of 60 increased from 21.3 years in 1995 to 24.0 years in 2010 for men and from 25.5 years to 27.0 years for women. A similar shift to higher ages between 1995 and 2010 was observed also for the first hospital admission, for both men and women (Figure 3 a-b). The time after the age of 60 until the first admission to the hospital increased from 12.2 to 14.0 years for men and for women from 13.9 to 15.9 years.

Whereas mortality curves appears to have become somewhat compressed over time (curves became narrower with a higher top), the ones representing first hospital admission seem to have shifted without being compressed.

In figures 4a and 4b, the remaining LE and the time until the first admission to the hospital are shown for different ages (60, but also for 70, 80, and 90 years) over time. For men, the remaining LE increased for all ages except for the 90 year olds where it remained rather stable. The time until first hospital admission increased for all ages, also for the 90-year olds (Figure 4a). For women, there was an increase in both the remaining LE and the time until first hospital admission for all age groups (Figure 4b). For both men and women the increase in remaining LE and time until first hospital admission was strongest for the 60- and 70-year olds as compared with the 80- and 90-year olds.

1  
2  
3 *Sensitivity analyses*  
4

5  
6 No changes in the first hospital admission trends were observed when we re-run the analyses  
7  
8 varying the number of days admitted to the hospital from 1 to 16 (results not shown but available  
9  
10 upon request).  
11

12  
13 Censoring all CVD as a cause of death from the overall mortality resulted in an increase of the  
14  
15 remaining LE at the age of 60 for both men and women and for all calendar years, but had no  
16  
17 impact on the shape of the trends, the curves still showed a similar shift. The same was true for  
18  
19 malignancies. Similarly with mortality, censoring CVD or malignancies from all causes of first  
20  
21 admission to the hospital had no impact on the trends, (results not shown but available upon  
22  
23 request).  
24  
25  
26  
27  
28  
29  
30  
31  
32  
33  
34  
35  
36  
37  
38  
39  
40  
41  
42  
43  
44  
45  
46  
47  
48  
49  
50  
51  
52  
53  
54  
55  
56  
57  
58  
59  
60

## DISCUSSION

The purpose of this study was to investigate time trends in the first admission to the hospital after the age of 60 in relation to mortality trends, for the period 1987 to 2010, for both men and women in Sweden. The age of 60 was chosen because we were interested in hospital admissions related to morbidity in the older population. All causes of hospital admissions were taken into account, including elective surgery, which has increased over the period. However, we do not believe that this has an impact on our findings since such procedures still constitute a minor part of all hospital admissions in Sweden (main causes of hospital admissions are cardiovascular diseases and neoplasms), and an even smaller part of first hospital admissions after the age of 60 (e.g. hip replacement stands for less than 0.01% of all first hospitalizations above the age of 60).

Our results showed that there has been a shift towards older ages for the first hospital admission meaning that individuals live longer until their first hospital admission occurs. The same pattern was observed for mortality. For men, the remaining LE at the age of 60 increased more than the time from age 60 until the first hospitalization. For women the opposite was true. This means that the time after the first hospital admission until death has increased for men and decreased for women. For the ages 70, 80, and 90, the shift of the remaining LE and first hospital admission was larger for younger ages (70- year olds) compared to the oldest (80- and 90-year olds); results for men and women were similar at these ages.

A convenient interpretation of the shift of the first hospital admission to higher ages is that it represents a shift of morbidity. However, a more cautious interpretation requires consideration of the changes in the organization of healthcare in Sweden between 1987 and 2010. Such changes are for example the shift from inpatient to outpatient care for some diagnosis, and also changes in the length of stay once hospitalized over time (which however should not affect time to first hospital admission). Further, the number of hospital beds in Sweden has decreased over the same

1  
2  
3 period[22]; however this could be a consequence of a more efficient healthcare, not necessarily  
4  
5 affecting the likelihood of getting admitted to the hospital [22].  
6  
7

8 The Swedish National Board of Health and Welfare has published a report regarding the causes of  
9  
10 hospital admissions between 1987 and 2010 in Sweden [23]. Cardiovascular diseases and  
11  
12 neoplasms were the two main causes of all admissions to the hospital in Sweden. This is confirmed  
13  
14 in our data also for the first admission. The two main causes were then followed by injury,  
15  
16 poisoning and certain other consequences of external causes (ICD 10 codes: S00-S99 and T00-T98,  
17  
18 ICD 9 codes: 800-999), diseases of the musculoskeletal system and connective tissue (ICD 10  
19  
20 codes: M00-M99, ICD 9 codes: 710-739), and diseases of the digestive system (ICD 10 codes:  
21  
22 K00-K93, ICD 9 codes: 520-579). In another report, the Swedish National Board of Health and  
23  
24 Welfare also investigated which diagnoses switched from treatment in an inpatient to an outpatient  
25  
26 setting [24]. It is suggested that even though some diseases are now more commonly treated with  
27  
28 day surgery in the outpatient care, very few diagnosis that were previously treated only with  
29  
30 inpatient care, are now treated solely in an outpatient setting (such as cataract, glaucoma, and eye  
31  
32 diseases in general). For diseases related to the circulatory system, the number of surgery events in  
33  
34 outpatient setting per admission in inpatient setting was 0,07 in 2010 [24]. However, the reports  
35  
36 present the total number of persons with the specific disease for every year. Any changes in the age  
37  
38 structure and size of the population seem not to have been taken into account. Also, the proportions  
39  
40 treated in outpatient surgery [24] are not given in age groups; it may be that younger individuals are  
41  
42 treated in an outpatient setting to a higher extent than older individuals who are generally at higher  
43  
44 risk of side effects. It is possible that over the period 1995 to 2010 some diseases have better control  
45  
46 in primary/outpatient care therefore delaying admission to inpatient care. Our trends would then not  
47  
48 necessarily mirror a healthier population but perhaps a population that has postponed severe illness.  
49  
50  
51  
52  
53

54  
55 Regarding changes in the length of stay once hospitalized, the length of stay in hospitals in Sweden  
56  
57 decreased between the years 1995 and 2010 [25]. The average hospital period (excluding geriatric  
58  
59  
60

1  
2  
3 and psychiatric care) was 5.03 days in 1998 and 4.31 days in 2010, a 14.3% decrease [24]. This is  
4  
5 supported by a Danish study for the oldest-old, comparing hospitalizations in the cohort of 1895  
6  
7 with the cohort of 1905. The younger cohort had more frequent hospital admissions but a shorter  
8  
9 length of hospital stay [26]. To examine the impact of this possible bias we run a sensitivity  
10  
11 analysis varying the number of days admitted to the hospital from 1 to 16, but no changes in trends  
12  
13 were observed.  
14

15  
16  
17 To sum up, in favour of the first interpretation of the shift in trends of first hospital admission to  
18  
19 higher ages – a shift of first severe morbidity – is the decline in the incidence of important public  
20  
21 health diseases such as myocardial infarction and stroke [9 15]. Better control of diseases in  
22  
23 primary care setting, making the outcome of diseases less severe, could be another aspect that may  
24  
25 have contributed to this trend, allowing for a shift of the first admission to the hospital after the age  
26  
27 of 60 to higher ages over time. Finally, since no changes in trends were observed when excluding  
28  
29 two major causes of hospital admissions and deaths for individuals over the age of 60, CVD and  
30  
31 malignancies, the observed shift indicates a rather universal change in the onset of the use of  
32  
33 inpatient care and deaths. However, a partial shift from inpatient care to outpatient care and a cut in  
34  
35 the number of hospital beds in Sweden need to be taken into consideration when interpreting the  
36  
37 trends.  
38  
39

40  
41  
42 A distinct advantage of our study is its nationwide coverage resulting in a large population without  
43  
44 any selection bias. Any hospital admission could be identified irrespective of the type of hospital  
45  
46 (both public and private hospitals are included in the National Inpatient Register). The longitudinal  
47  
48 design allowed us to identify the first event and to follow individuals over time to estimate the  
49  
50 hospitalization-free time from the age of 60.  
51

## 52 53 54 **CONCLUSION**

1  
2  
3 This study showed that the time at first hospital admission for men and women over the age of 60 in  
4 Sweden has been postponed to higher ages between 1995 and 2010. This was in line with the  
5 postponement of age at death for the same period. Men experienced a larger increase in remaining  
6 LE at age 60 than women. Men and women experienced a similar shift in time to first hospital  
7 admission. This result may be an indicator of a postponement of first severe morbidity to higher  
8 ages, even if policy changes in the healthcare sector cannot be ruled out completely as a  
9 confounding factor. Future research should look into trends of subsequent hospitalizations, and  
10 together with studies of incidence trends in major diseases, describe the overall health of the aging  
11 population.  
12  
13  
14  
15  
16  
17  
18  
19  
20  
21  
22

## 23 CONTRIBUTIONS

24  
25  
26 All authors - Korinna Karampampa (KK), Sven Drefahl (SD), Tomas Andersson (TA), Anders  
27 Ahlbom (AA), and Karin Modig (KM), were involved in the conception and design of the study.  
28 KK and TA performed the analysis of the data. All authors (KK, SD, TA, AA, and KM) were  
29 involved in the interpretation of the results. KK and KM drafted the manuscript and all authors  
30 (including KK and KM) contributed with critical revisions to the contents of the manuscript. The  
31 final version of the manuscript was approved from all authors (KK, SD, TA, AA, and KM).  
32  
33  
34  
35  
36  
37  
38  
39  
40

## 41 ACKNOWLEDGEMENTS

42  
43 This work was supported by a grant from the Swedish council for working life and social research  
44 [Forskningsrådet för arbetsliv och socialvetenskap, FAS] (grant number: 2011-0843). The regional  
45 ethics committee in Stockholm [Regionala etikprövningsnämnden i Stockholm, EPN] provided an  
46 approval for this study (Dnr 2011/136-31/5). There are no conflicts of interest in connection with  
47 this paper.  
48  
49  
50  
51  
52  
53  
54

## 55 REFERENCES

- 1  
2  
3 1. Vaupel JW, Zhang Z, van Raalte AA. Life expectancy and disparity: an international comparison  
4 of life table data. *BMJ Open* 2011;**1**(1):e000128 doi: 10.1136/bmjopen-2011-000128[published  
5 Online First: Epub Date]].  
6  
7
- 8  
9 2. Oeppen J, Vaupel JW. Demography. Broken limits to life expectancy. *Science*  
10 2002;**296**(5570):1029-31 doi: 10.1126/science.1069675[published Online First: Epub Date]].  
11  
12
- 13 3. Bronnum-Hansen H, Petersen I, Jeune B, Christensen K. Lifetime according to health status  
14 among the oldest olds in Denmark. *Age Ageing* 2009;**38**(1):47-51 doi:  
15 10.1093/ageing/afn239[published Online First: Epub Date]].  
16  
17
- 18 4. Drefahl S, Lundstrom H, Modig K, Ahlbom A. The era of centenarians: mortality of the oldest  
19 old in Sweden. *J Intern Med* 2012;**272**(1):100-2 doi: 10.1111/j.1365-2796.2012.02518.x[published  
20 Online First: Epub Date]].  
21  
22
- 23 5. Fries JF. Aging, natural death, and the compression of morbidity. *N Engl J Med*  
24 1980;**303**(3):130-5 doi: 10.1056/NEJM198007173030304[published Online First: Epub Date]].  
25  
26
- 27 6. Olshansky SJ, Rudberg, M. A., Carnes, B. A., Cassel, B. A., & Brady, J.A. Trading off longer life  
28 for worsening health: The expansion of morbidity hypothesis. *Journal of Aging and Health*  
29 1991;**3**:194-216  
30  
31
- 32 7. Robine JM, & Mathers, C. *Measuring the compression or expansion of morbidity through*  
33 *changes in health expectancy. In J.M. Robine, et al. Calculation of health expectancies,*  
34 *harmonization, consensus achieved and future perspectives (pp. 169-286). Paris: Libbey, 1993.*  
35  
36
- 37 8. Larsson K, Thorslund M. Chapter 8: old people's health. *Scand J Public Health Suppl*  
38 2006;**67**:185-98 doi: 10.1080/14034950600677253[published Online First: Epub Date]].  
39  
40
- 41 9. Modig K, Drefahl S, Andersson T, Ahlbom A. The aging population in Sweden: can declining  
42 incidence rates in MI, stroke and cancer counterbalance the future demographic challenges? *Eur J*  
43 *Epidemiol* 2012;**27**(2):139-45 doi: 10.1007/s10654-012-9653-2[published Online First: Epub  
44 Date]].  
45  
46  
47  
48  
49  
50  
51  
52  
53  
54  
55  
56  
57  
58  
59  
60



- 1  
2  
3 10. Parker MG, Ahacic K, Thorslund M. Health changes among Swedish oldest old: prevalence  
4 rates from 1992 and 2002 show increasing health problems. *J Gerontol A Biol Sci Med Sci*  
5 2005;**60**(10):1351-5  
6  
7  
8  
9  
10 11. Thorslund M and Parker MG. Hur mår egentligen de äldre? *Lakartidningen*, 2005.  
11 102(43):3119-24..  
12  
13  
14 12. Crimmins EM, Beltran-Sanchez H. Mortality and morbidity trends: is there compression of  
15 morbidity? *J Gerontol B Psychol Sci Soc Sci* 2011;**66**(1):75-86 doi:  
16 10.1093/geronb/gbq088[published Online First: Epub Date].  
17  
18  
19  
20 13. Carandang R, Seshadri S, Beiser A, et al. Trends in incidence, lifetime risk, severity, and 30-day  
21 mortality of stroke over the past 50 years. *Jama* 2006;**296**(24):2939-46 doi:  
22 10.1001/jama.296.24.2939[published Online First: Epub Date].  
23  
24  
25  
26  
27 14. Langa KM, Larson EB, Karlawish JH, et al. Trends in the prevalence and mortality of cognitive  
28 impairment in the United States: is there evidence of a compression of cognitive morbidity?  
29 *Alzheimers Dement* 2008;**4**(2):134-44 doi: 10.1016/j.jalz.2008.01.001[published Online First: Epub  
30 Date].  
31  
32  
33  
34  
35  
36 15. Peeters A, Nusselder WJ, Stevenson C, Boyko EJ, Moon L, Tonkin A. Age-specific trends in  
37 cardiovascular mortality rates in the Netherlands between 1980 and 2009. *Eur J Epidemiol*  
38 2011;**26**(5):369-73 doi: 10.1007/s10654-011-9546-9[published Online First: Epub Date].  
39  
40  
41  
42  
43 16. Akushevich I, Kravchenko J, Ukraintseva S, Arbeev K, Yashin AI. Time trends of incidence of  
44 age-associated diseases in the US elderly population: medicare-based analysis. *Age Ageing* 2013  
45 doi: 10.1093/ageing/aft032[published Online First: Epub Date].  
46  
47  
48  
49 17. Statistics Sweden [Statistiska centralbyrån]. Swedish Register of the Total Population [Registret  
50 över totalbefolkningen (RTB)]. Information available: [http://www.scb.se/Pages/List\\_257499.aspx](http://www.scb.se/Pages/List_257499.aspx).  
51  
52  
53  
54  
55  
56  
57  
58  
59  
60

- 1  
2  
3 18. Statistics Sweden [Statistiska centralbyrån]. Longitudinal Integration Database for Health  
4 Insurance and Labour Market Studies [Longitudinell integrationsdatabas för sjukförsäkrings- och  
5 arbetsmarknadsstudier] (LISA). Information available: [http://www.scb.se/Pages/List\\_257742.aspx](http://www.scb.se/Pages/List_257742.aspx)  
6  
7  
8  
9  
10 19. Socialstyrelsen [National Board of Health and Welfare]. National Inpatient Register  
11 [Patientregistret]. Information available:  
12 <http://www.socialstyrelsen.se/register/halsodataregister/patientregistret>.  
13  
14  
15  
16 20. Socialstyrelsen [National Board of Health and Welfare]. Cause of Death Register  
17 [Dödsorsaksregistret]. Information available:  
18 <http://www.socialstyrelsen.se/register/dodsorsaksregistret>.  
19  
20  
21 21. Socialstyrelsen [National Board of Health and Welfare]. Publications 2011. Hjärtinfarkter  
22 1987–2010 [Myocardial infarctions in Sweden ,1987–2010] Available:  
23 <http://www.socialstyrelsen.se/publikationer2011/2011-11-36>. Accessed: 05 September 2012.  
24  
25  
26 22. Sveriges kommuner och landsting. Från sjukhussäng till e-hälsa. Utvecklingstendenser inom  
27 hälso- och sjukvården. Stockholm: Sveriges kommuner och landsting., 2010.  
28  
29  
30 23. Socialstyrelsen [National Board of Health and Welfare]. Publications 2012. Inpatient diseases in  
31 Sweden 1987–2010 [Sjukdomar i slutenvård 1987- 2010]. Secondary Inpatient diseases in Sweden  
32 1987–2010 [Sjukdomar i slutenvård 1987- 2010] Available:  
33 <http://www.socialstyrelsen.se/publikationer2012/2012-10-18> Accessed: 16 November 2012.  
34  
35  
36 24. Socialstyrelsen [National Board of Health and Welfare]. Publications 2012. Patientregistret för  
37 2010 ur ett DRG-perspektiv [National In-patient Care Register in 2010, from a DRG perspective].  
38 Available: <http://www.socialstyrelsen.se/publikationer2012/2012-5-25>. Accessed: 16 November  
39 2012.  
40  
41  
42  
43 25. Organization for Economic Co-operation and Development (OECD). OECD statistics. OECD  
44 Health Data: Health care utilisation: *Average length of stay: in-patient care*. Available:  
45 <http://stats.oecd.org/> Accessed: 07 June 2013.  
46  
47  
48  
49  
50  
51  
52  
53  
54  
55  
56  
57  
58  
59  
60

1  
2  
3  
4  
5  
6  
7  
8  
9  
10  
11  
12  
13  
14  
15  
16  
17  
18  
19  
20  
21  
22  
23  
24  
25  
26  
27  
28  
29  
30  
31  
32  
33  
34  
35  
36  
37  
38  
39  
40  
41  
42  
43  
44  
45  
46  
47  
48  
49  
50  
51  
52  
53  
54  
55  
56  
57  
58  
59  
60

26. Oksuzyan A, Jeune B, Juel K, Vaupel JW, Christensen K. Changes in hospitalisation and surgical procedures among the oldest-old: a follow-up study of the entire Danish 1895 and 1905 cohorts from ages 85 to 99 years. *Age Ageing*. 2013 Mar 26. [Epub ahead of print]

For peer review only

## Figures

**Fig. 1** Description of study measures.

**Fig. 2** Distribution of all-cause mortality, (a) for men and (b) for women, for four calendar years, ages 60-100. Vertical lines present the remaining life expectancy, LE, at age 60 for the same calendar years.

**Fig. 3** Distribution of all-cause first hospital admission, (a) for men and (b) for women, for four calendar years, ages 60-100. Vertical lines present the time to first hospital admission after the age of 60 for the same calendar years.

**Fig. 4** Remaining life-expectancy (LE) and time to first admission to the hospital after the ages of 60, 70, 80, and 90, (a) for men and (b) for women.

1  
2  
3  
4  
5  
6  
7  
8  
9  
10  
11  
12  
13  
14  
15  
16  
17  
18  
19  
20  
21  
22  
23  
24  
25  
26  
27  
28  
29  
30  
31  
32  
33  
34  
35  
36  
37  
38  
39  
40  
41  
42  
43  
44  
45  
46  
47  
48  
49  
50  
51  
52  
53  
54  
55  
56  
57  
58  
59  
60

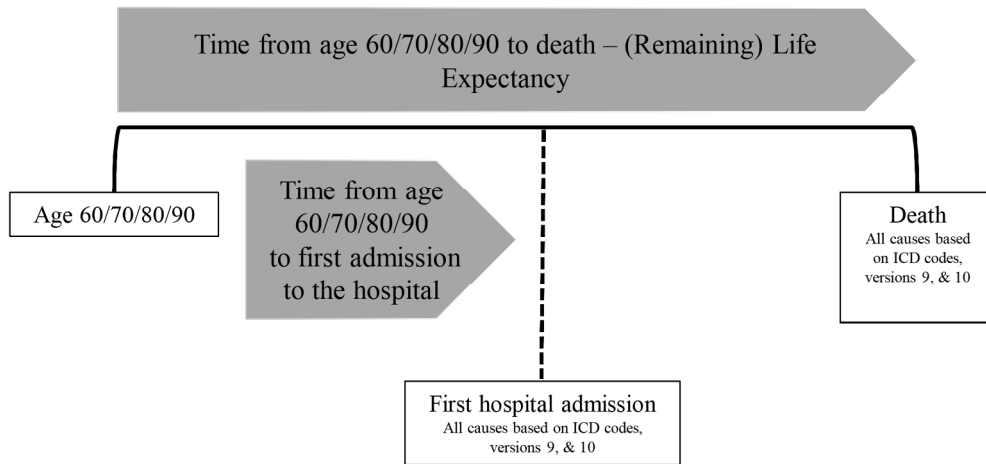

Description of study measures.  
177x84mm (300 x 300 DPI)

er review only



Distribution of all-cause mortality, (a) for men and (b) for women, for four calendar years, ages 60-100. Vertical lines present the remaining life expectancy, LE, at age 60 for the same calendar years. 131x166mm (300 x 300 DPI)

1  
2  
3  
4  
5  
6  
7  
8  
9  
10  
11  
12  
13  
14  
15  
16  
17  
18  
19  
20  
21  
22  
23  
24  
25  
26  
27  
28  
29  
30  
31  
32  
33  
34  
35  
36  
37  
38  
39  
40  
41  
42  
43  
44  
45  
46  
47  
48  
49  
50  
51  
52  
53  
54  
55  
56  
57  
58  
59  
60

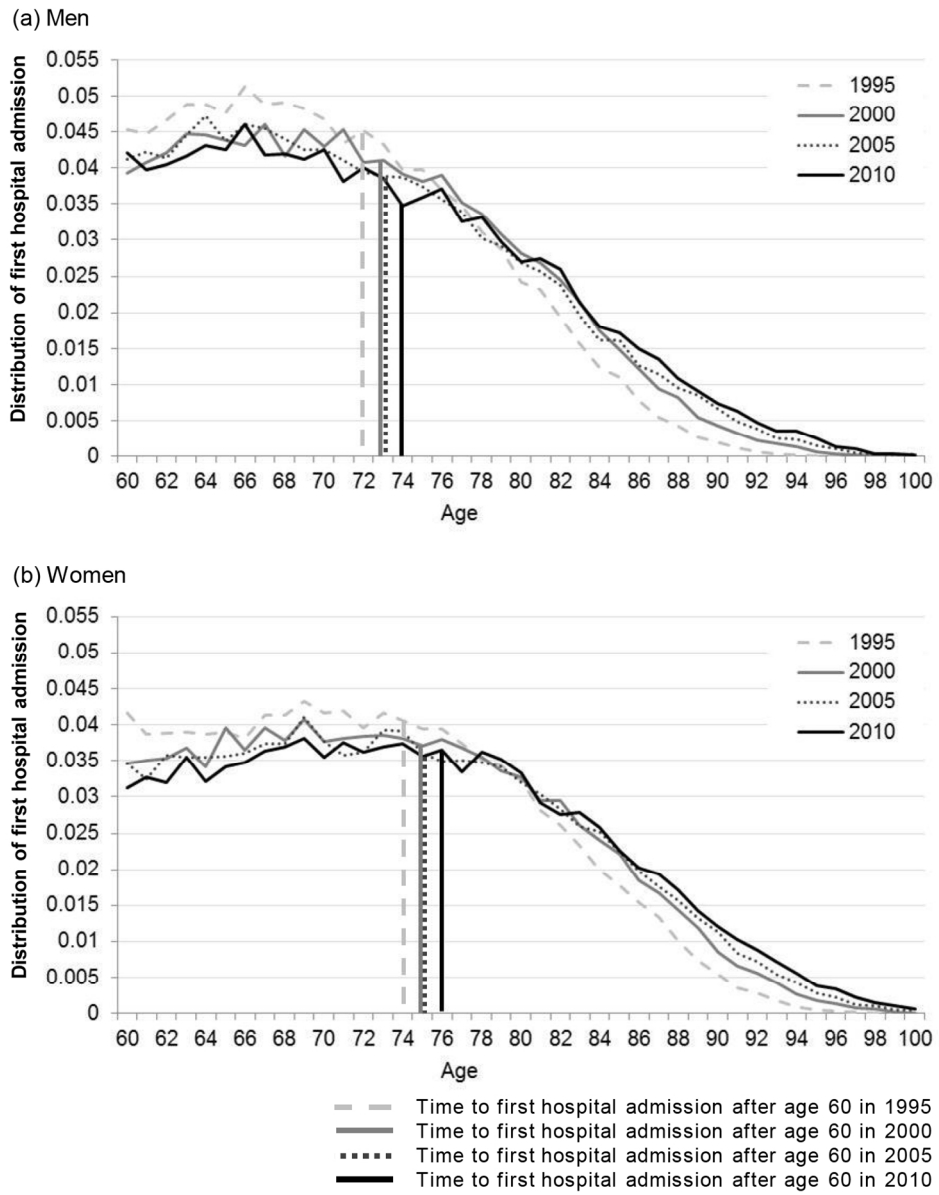

Distribution of all-cause first hospital admission, (a) for men and (b) for women, for four calendar years, ages 60-100. Vertical lines present the time to first hospital admission after the age of 60 for the same calendar years.  
132x168mm (300 x 300 DPI)

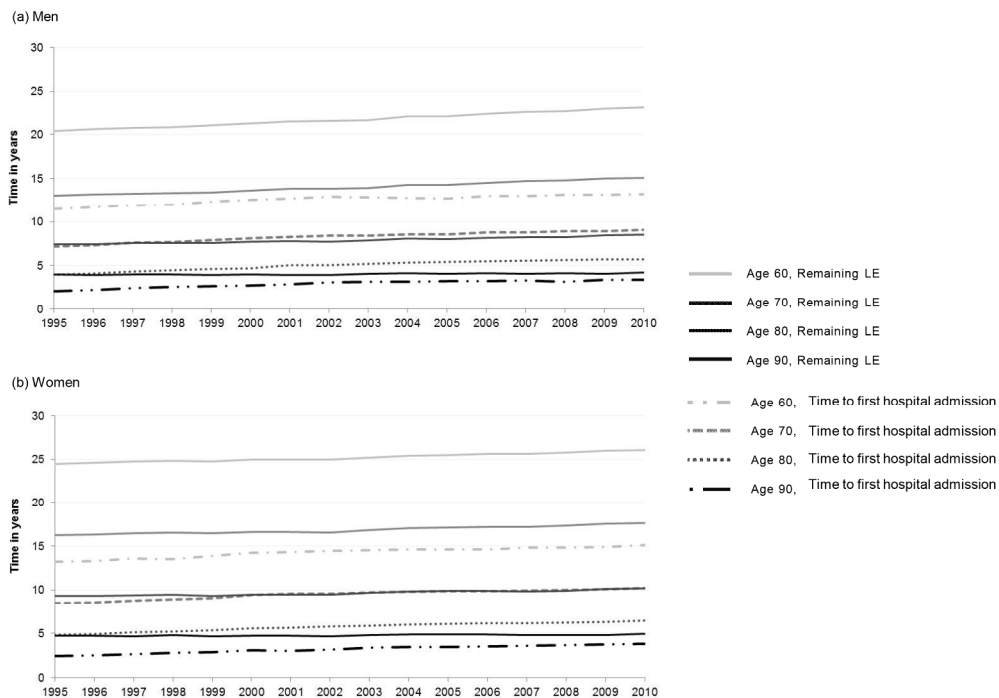

Remaining life-expectancy (LE) and time to first admission to the hospital after the ages of 60, 70, 80, and 90, (a) for men and (b) for women.  
 233x163mm (300 x 300 DPI)



1  
2  
3 Trends in age at first hospital admission in relation to trends in life  
4  
5  
6 expectancy in Swedish men and women above the age of 60  
7  
8

9 Korinna Karampampa<sup>1</sup>, Sven Drefahl<sup>1,2</sup>, Tomas Anderson<sup>1,3</sup>, Anders Ahlbom<sup>1</sup>, Karin Modig<sup>1</sup>  
10  
11

12 <sup>1</sup> Institute of Environmental Medicine, Division of Epidemiology, Karolinska Institutet, Stockholm, Sweden  
13

14 <sup>2</sup> Department of Sociology, Demography Unit, Stockholm University, Stockholm, Sweden  
15

16 <sup>3</sup> Centre for Occupational and Environmental Medicine, Stockholm County Council, Stockholm, Sweden  
17  
18  
19  
20  
21

22 **Corresponding Author:**  
23

24 Korinna Karampampa  
25  
26

27 Institute of Environmental Medicine  
28

29 Division of Epidemiology  
30  
31

32 Karolinska Institutet  
33  
34

35 Box 210  
36  
37

38 171 77 Stockholm, Sweden  
39  
40

41 Email: korinna.karampampa@ki.se  
42  
43

44 Tel: +46 704 33 74 15  
45  
46  
47  
48

49 **Keywords:** Hospital admission, trends, death, mortality, morbidity, Sweden  
50  
51  
52  
53  
54  
55  
56  
57  
58  
59  
60

## Abstract

**Objectives:** To examine whether the first admission to hospital after the age of 60 has been postponed to higher ages for men and women in Sweden, in line with the shift in mortality.

**Design:** This nation-wide observational study was based on data obtained from national registries in Sweden. The study cohort was created by linking the Register of the Total Population in Sweden with the National Inpatient Register and the Cause of Death Register.

**Setting:** The entire Swedish population born between 1895 and 1950 was followed up between 1987 and 2010 with respect to hospital admissions and deaths using the national registry data.

**Primary outcome measures:** Time from age 60 until the first admission to the hospital, regardless of diagnose, and the time from age 60 until death (remaining life expectancy, LE) were estimated for the years 1995 to 2010. The difference between these two measures was also estimated for the same period.

**Results:** Between 1995 and 2010 both mortality and first hospital admission shifted to higher ages. The average time from age 60, 70, 80, and 90 until the first hospital admission increased at all ages. The remaining LE at age 60, 70, and 80 increased for men and women. For the 90 year olds it was stable.

**Conclusions:** In Sweden, the first hospital admission after the age of 60 has been pushed to higher ages in line with mortality for the ages 60 and above. First admission to the hospital could indicate the onset of first severe morbidity; however the re-organization of healthcare may also have influenced the observed trends.

## Article Summary

### Focus:

- The proportion of old people in the population has rapidly increased over the past years. The question of whether health has improved at a similar pace as life expectancy has become very important. Admission rates to the hospital over time provide important information in order to interpret changes in the health of the elderly.
- We examined whether the first hospital admission **after the age of 60** has been postponed to higher ages, for both men and women in Sweden; trends in the first admission to the hospital were compared to mortality trends.

### Key messages:

- The time at first hospital admission for men and women over the age of 60 in Sweden has been postponed to higher ages between 1995 and 2010, in line with the postponement of age at death for the same period.
- This result could probably be explained by a postponement of first severe morbidity to higher ages. Policy changes in the healthcare sector cannot be ruled out completely as a confounding factor.

### Strengths and limitations:

- A distinct advantage of our study is its nationwide coverage resulting in a large population without any selection bias. The longitudinal design allowed us to identify the first hospital admission and to follow individuals over time to estimate the hospitalization-free time from the age of 60.

- A limitation is that this study focuses on the time after the age of 60 until the first admission to the hospital, not taking into consideration subsequent events.

For peer review only

## INTRODUCTION

Life span has continuously increased for many countries including Sweden during the twentieth century [1] and even earlier. This trend was initiated by reductions in infant and child mortality; however, since the 1950s, most part of the mortality reduction was observed for older ages [2]. This has resulted in a rapid increase in the proportion of old individuals in the population [3]. In Sweden, the number of individuals that live to celebrate their 100<sup>th</sup> birthday has increased considerably from 1969 to 2009 (a 9-fold increase for men and a 18-fold increase for women) [4]. The question of whether health has improved at a similar pace as life expectancy has become very important. **Has morbidity decreased faster than mortality (compression of morbidity [5]), slower than mortality (expansion of morbidity [6]), or at the same pace as mortality (relative compression of morbidity [7])?** A potential challenge with an aging population is an increase in the number of individuals with chronic diseases, leading to an increased demand for medical care [8]. This scenario may however not be true if morbidity is postponed to higher ages in parallel with the increase in life expectancy [9].

Previous research has not reached consensus on how the health of the elderly has changed over time [10 11] mainly since health is a multidimensional concept measured by different indicators. In ageing research, measures of disability and functional limitations have been most commonly used [12]. Several studies have also examined incidence trends of major diseases among older individuals with different results [9 13-16], some diseases have declined [9 13 15] whereas some appear to have been stable or even increasing [16].

In addition to examining disease specific trends, overall admission rates to the hospital over time could be informative in order to interpret changes in the health and the healthcare over time. In the present study, we examined trends in first hospital admission after the age of 60 for the period 1987 to 2010, i.e. whether the first hospital admission has been postponed to higher ages, for both men

1  
2  
3 and women in Sweden. Trends in the first admission to the hospital were compared to mortality  
4  
5 trends.  
6  
7  
8  
9

## 10 11 **MATERIAL AND METHODS**

### 12 13 14 **Study Cohort**

15  
16  
17 The study cohort was created by linking the Register of the Total Population in Sweden with the  
18  
19 National Inpatient Register, Cause of Death Register, and the Longitudinal Integration Database for  
20  
21 Health Insurance and Labour Market Studies (LISA). In Sweden, all individuals have a unique  
22  
23 personal identification number, which makes it possible to identify them in all registries. All  
24  
25 databases were linked using this personal identification number. The linkage was conducted by  
26  
27 Statistics Sweden and the researchers received de-identified data sources with a reference number  
28  
29 (unique for each individual) instead of the personal identification number.  
30  
31  
32

33  
34 The Swedish Register of the Total Population [17] has nation-wide coverage since 1968. It was  
35  
36 used to collect information regarding the date of birth and migration status of individuals in the  
37  
38 study cohort.  
39

40  
41 In order to minimize the risk of including individuals whose emigration or death has not been  
42  
43 properly recorded in the Register of the Total Population, the LISA database [18] was used, which  
44  
45 includes information about individuals' pensions and social transfers on an annual basis.  
46  
47

48  
49 The National Inpatient Register [19] has nation-wide coverage since 1987 and was used to collect  
50  
51 information about the inpatient care received by individuals living in Sweden from 1987 to 2010.  
52  
53  
54  
55  
56  
57  
58  
59  
60

1  
2  
3 The Cause of Death Register [20] was used as to identify all deaths occurring inside or outside  
4  
5 Sweden (for individuals registered in Sweden). Both the Cause of Death Register and the National  
6  
7 Inpatient Register are maintained by The National Board of Health and Welfare.  
8  
9

## 10 **Setting**

11  
12  
13 All men and women **above the age of 60** that were born between 1895 and 1950 and were living in  
14  
15 Sweden in 1987 were included in the study cohort. They were followed for hospital admissions and  
16  
17 deaths from 1987 to 2010. The follow-up ended at whichever of the following dates occurred first;  
18  
19 date of first hospital admission after the age of 60, date of death, date of migration, or 31st  
20  
21 December 2010.  
22  
23  
24

## 25 **Statistical Analysis**

26  
27  
28 The graphical representation of the study measures can be found in Figure 1.  
29  
30

### 31 *Mortality*

32  
33  
34 Period life tables were constructed for calendar years 1995 to 2010 to obtain the remaining life  
35  
36 expectancy, LE, and the expected distribution of deaths. Calculations were based on age-specific  
37  
38 death risks, estimated by dividing the number of deaths for each calendar year with the total number  
39  
40 of individuals at risk in that calendar year (i.e. population at the beginning of the calendar year).  
41  
42 The remaining LE at a given age, for each calendar year, was derived from the life table by dividing  
43  
44 the total number of person-years after a given age with the number of persons alive at that age. The  
45  
46 expected distribution of deaths was calculated by multiplying the age-specific death risk with the  
47  
48 probability of being alive at that age.  
49  
50  
51

### 52 *First hospital admission*

53  
54  
55  
56  
57  
58  
59  
60

1  
2  
3 First admission to the hospital was defined as the first admission after the age of 60 with a  
4  
5 minimum duration of two nights. Both fatal and non-fatal events were taken into account.  
6  
7

8 Since the National Patient Register had complete national coverage first in 1987, it was not possible  
9  
10 to know whether individuals had any hospital admissions before 1987. Consequently, since we were  
11  
12 interested to capture the first admission to the hospital after the age of 60 that was independent of  
13  
14 any admissions happening before (i.e. we wanted to exclude re-admissions), we applied a 7-year  
15  
16 transition period that has been previously used by the Swedish National Board of Health and  
17  
18 Welfare in their calculations of incidence of myocardial infarction [21]. Thus, all individuals  
19  
20 hospitalized between 1987 and 1994 were excluded from the study population. In a next step we  
21  
22 tested whether the 7-year period was sufficient by comparing the age-specific hospital admission  
23  
24 rates using the longest possible follow up period, 23 years (from 2010 and back to 1987), and by  
25  
26 restricting the follow up to 7 years (from 2010 to 2003). The calculations showed that a period of 7  
27  
28 years was likely not long enough; the rate of admission appeared to be overestimated in the  
29  
30 beginning of the period. In order to account for this overestimation, age-specific correction factors,  
31  
32 derived from the comparison, were applied on the years 1995-2010. The correction factors weighted  
33  
34 down the admission rates in the beginning of the follow-up period.  
35  
36  
37  
38  
39

40 Analyses of first hospital admission followed the same procedure as for deaths, using period life  
41  
42 tables to estimate the time until the first admission to the hospital and the expected distribution of  
43  
44 first hospitalizations. The age-specific risk of being admitted to the hospital for the first time after  
45  
46 the age of 60 was calculated based on the number of admissions for each calendar year divided with  
47  
48 the population at the beginning of the calendar year. The time at a given age until the first  
49  
50 admission to the hospital, for each calendar year, was derived by dividing the total number of  
51  
52 hospitalization-free person years after a given age with the number of persons without an admission  
53  
54 to the hospital at that age. The expected distribution of first hospital admissions was calculated by  
55  
56  
57  
58  
59  
60



1  
2  
3 multiplying the age-specific risk of being admitted to the hospital with the probability of being free  
4  
5 of hospitalization at that age.  
6

7  
8 The International Classification of Diseases (ICD) 9 and 10 was used to determine the causes of  
9  
10 hospitalizations and deaths. All causes were taken into account.  
11

### 12 13 *Sensitivity analyses*

14  
15  
16 An admission to the hospital of a minimum duration of two nights was chosen for the analysis to  
17  
18 ensure some degree of severity of a disease. In the sensitivity analysis we altered the minimum stay  
19  
20 in the hospital between one and 16 nights to examine the impact our definition of hospital  
21  
22 admission had on the trends. After a careful examination of our data, we observed that hospital  
23  
24 stays that were longer than 16 nights were rare. Therefore we chose to vary the minimum stay in the  
25  
26 hospital between one and sixteen nights.  
27  
28

29  
30 In addition, to evaluate the impact on the trends from two major causes of hospitalizations and  
31  
32 deaths, sensitivity analyses were made where we excluded all cardiovascular diseases, (CVD), and  
33  
34 all malignancies respectively. CVD was defined as; ICD 9 codes: 340-359, ICD 10 codes: I00-I99.  
35  
36 Malignancies were defined as; ICD 9 codes: 140-206, ICD 10 codes: C00-C97.  
37  
38

### 39 40 *Ethics Permission*

41  
42  
43 An ethics approval for this study was obtained from the regional ethics committee in Stockholm,  
44  
45 Dnr 2011/136-31/5.  
46  
47  
48  
49  
50  
51  
52  
53  
54  
55  
56  
57  
58  
59  
60

## RESULTS

In Figure 2 (a-b) the expected distribution of deaths for the ages 60 to 100 is presented for four calendar years, 1995, 2000, 2005, and 2010, for men (a) and women (b). Corresponding results of the expected distribution of first hospital admissions for 60 to 100 year-old individuals, for the same calendar years, are shown in Figures 3a men and 3b women. Vertical lines show the remaining LE at age 60 and the time from age 60 until the first admission to the hospital for each calendar year.

For both men and women there has been a shift in mortality towards older ages over time, which is visible from the shift of the curves to the right (Figure 2 a-b). The remaining LE at the age of 60 increased from 21.3 years in 1995 to 24.0 years in 2010 for men and from 25.5 years to 27.0 years for women. A similar shift to higher ages between 1995 and 2010 was observed also for the first hospital admission, for both men and women (Figure 3 a-b). The time after the age of 60 until the first admission to the hospital increased from 12.2 to 14.0 years for men and for women from 13.9 to 15.9 years.

Whereas mortality curves appears to have become somewhat compressed over time (curves became narrower with a higher top), the ones representing first hospital admission seem to have shifted without being compressed.

In figures 4a and 4b, the remaining LE and the time until the first admission to the hospital are shown for different ages (60, but also for 70, 80, and 90 years) over time. For men, the remaining LE increased for all ages except for the 90 year olds where it remained rather stable. The time until first hospital admission increased for all ages, also for the 90-year olds (Figure 4a). For women, there was an increase in both the remaining LE and the time until first hospital admission for all age groups (Figure 4b). For both men and women the increase in remaining LE and time until first hospital admission was strongest for the 60- and 70-year olds as compared with the 80- and 90-year olds.

1  
2  
3 *Sensitivity analyses*  
4

5  
6 No changes in the first hospital admission trends were observed when we re-run the analyses  
7  
8 varying the number of days admitted to the hospital from 1 to 16 (results not shown but available  
9  
10 upon request).  
11

12  
13 Censoring all CVD as a cause of death from the overall mortality resulted in an increase of the  
14  
15 remaining LE at the age of 60 for both men and women and for all calendar years, but had no  
16  
17 impact on the shape of the trends, the curves still showed a similar shift. The same was true for  
18  
19 malignancies. Similarly with mortality, censoring CVD or malignancies from all causes of first  
20  
21 admission to the hospital had no impact on the trends, (results not shown but available upon  
22  
23 request).  
24  
25  
26  
27  
28  
29  
30  
31  
32  
33  
34  
35  
36  
37  
38  
39  
40  
41  
42  
43  
44  
45  
46  
47  
48  
49  
50  
51  
52  
53  
54  
55  
56  
57  
58  
59  
60

## DISCUSSION

The purpose of this study was to investigate time trends in the first admission to the hospital after the age of 60 in relation to mortality trends, for the period 1987 to 2010, for both men and women in Sweden. The age of 60 was chosen because we were interested in hospital admissions related to morbidity in the older population. All causes of hospital admissions were taken into account, including elective surgery, which has increased over the period. However, we do not believe that this has an impact on our findings since such procedures still constitute a minor part of all hospital admissions in Sweden (main causes of hospital admissions are cardiovascular diseases and neoplasms), and an even smaller part of first hospital admissions after the age of 60 (e.g. hip replacement stands for less than 0.01% of all first hospitalizations above the age of 60).

Our results showed that there has been a shift towards older ages for the first hospital admission meaning that individuals live longer until their first hospital admission occurs. The same pattern was observed for mortality. For men, the remaining LE at the age of 60 increased more than the time from age 60 until the first hospitalization. For women the opposite was true. This means that the time after the first hospital admission until death has increased for men and decreased for women. For the ages 70, 80, and 90, the shift of the remaining LE and first hospital admission was larger for younger ages (70- year olds) compared to the oldest (80- and 90-year olds); results for men and women were similar at these ages.

A convenient interpretation of the shift of the first hospital admission to higher ages is that it represents a shift of morbidity. However, a more cautious interpretation requires consideration of the changes in the organization of healthcare in Sweden between 1987 and 2010. Such changes are for example the shift from inpatient to outpatient care for some diagnosis, and also changes in the length of stay once hospitalized over time (which however should not affect time to first hospital admission). Further, the number of hospital beds in Sweden has decreased over the same

1  
2  
3 period[22]; however this could be a consequence of a more efficient healthcare, not necessarily  
4  
5 affecting the likelihood of getting admitted to the hospital [22].  
6  
7

8 The Swedish National Board of Health and Welfare has published a report regarding the causes of  
9  
10 hospital admissions between 1987 and 2010 in Sweden [23]. Cardiovascular diseases and  
11  
12 neoplasms were the two main causes of all admissions to the hospital in Sweden. This is confirmed  
13  
14 in our data also for the first admission. The two main causes were then followed by injury,  
15  
16 poisoning and certain other consequences of external causes (ICD 10 codes: S00-S99 and T00-T98,  
17  
18 ICD 9 codes: 800-999), diseases of the musculoskeletal system and connective tissue (ICD 10  
19  
20 codes: M00-M99, ICD 9 codes: 710-739), and diseases of the digestive system (ICD 10 codes:  
21  
22 K00-K93, ICD 9 codes: 520-579). In another report, the Swedish National Board of Health and  
23  
24 Welfare also investigated which diagnoses switched from treatment in an inpatient to an outpatient  
25  
26 setting [24]. It is suggested that even though some diseases are now more commonly treated with  
27  
28 day surgery in the outpatient care, very few diagnosis that were previously treated only with  
29  
30 inpatient care, are now treated solely in an outpatient setting (such as cataract, glaucoma, and eye  
31  
32 diseases in general). For diseases related to the circulatory system, the number of surgery events in  
33  
34 outpatient setting per admission in inpatient setting was 0,07 in 2010 [24]. Thus—even if a shift  
35  
36 from inpatient to outpatient care for CVD would have taken place over the period, it is very small.  
37  
38  
39  
40  
41 However, the reports present the total number of persons with the specific disease for every  
42  
43 year. Any changes in the age structure and size of the population seem not to have been taken into  
44  
45 account. Also, the proportions treated in outpatient surgery [24] are not given in age groups; it may  
46  
47 be that younger individuals are treated in an outpatient setting to a higher extent than older  
48  
49 individuals who are generally at higher risk of side effects. It is possible that over the period 1995 to  
50  
51 2010 some diseases have better control in primary/outpatient care therefore delaying admission to  
52  
53 inpatient care. Our trends would then not necessarily mirror a healthier population but perhaps a  
54  
55 population that has postponed severe illness.  
56  
57  
58  
59  
60

1  
2  
3 Regarding changes in the length of stay once hospitalized, the length of stay in hospitals in Sweden  
4  
5 decreased between the years 1995 and 2010 [25]. The average hospital period (excluding geriatric  
6  
7 and psychiatric care) was 5.03 days in 1998 and 4.31 days in 2010, a 14.3% decrease [24]. This is  
8  
9 supported by a Danish study for the oldest-old, comparing hospitalizations in the cohort of 1895  
10  
11 with the cohort of 1905. The younger cohort had more frequent hospital admissions but a shorter  
12  
13 length of hospital stay [26]. To examine the impact of this possible bias we run a sensitivity  
14  
15 analysis varying the number of days admitted to the hospital from 1 to 16, but no changes in trends  
16  
17 were observed.  
18  
19

20  
21 To sum up, in favour of the first interpretation of the shift in trends of first hospital admission to  
22  
23 higher ages – a shift of first severe morbidity – is the decline in the incidence of important public  
24  
25 health diseases such as myocardial infarction and stroke [9 15]. Better control of diseases in  
26  
27 primary care setting, making the outcome of diseases less severe, could be another aspect that may  
28  
29 have contributed to this trend, allowing for a shift of the first admission to the hospital after the age  
30  
31 of 60 to higher ages over time. Finally, since no changes in trends were observed when excluding  
32  
33 two major causes of hospital admissions and deaths for individuals over the age of 60, CVD and  
34  
35 malignancies, the observed shift indicates a rather universal change in the onset of the use of  
36  
37 inpatient care and deaths. However, a partial shift from inpatient care to outpatient care and a cut in  
38  
39 the number of hospital beds in Sweden need to be taken into consideration when interpreting the  
40  
41 trends.  
42  
43  
44

45  
46 A distinct advantage of our study is its nationwide coverage resulting in a large population without  
47  
48 any selection bias. Any hospital admission could be identified irrespective of the type of hospital  
49  
50 (both public and private hospitals are included in the National Inpatient Register). The longitudinal  
51  
52 design allowed us to identify the first event and to follow individuals over time to estimate the  
53  
54 hospitalization-free time from the age of 60.  
55  
56  
57  
58  
59  
60

## CONCLUSION

This study showed that the time at first hospital admission for men and women over the age of 60 in Sweden has been postponed to higher ages between 1995 and 2010. This was in line with the postponement of age at death for the same period. Men experienced a larger increase in remaining LE at age 60 than women. Men and women experienced a similar shift in time to first hospital admission. This result may be an indicator of a postponement of first severe morbidity to higher ages, even if policy changes in the healthcare sector cannot be ruled out completely as a confounding factor. Future research should look into trends of subsequent hospitalizations, and together with studies of incidence trends in major diseases, describe the overall health of the aging population.

## CONTRIBUTIONS

All authors - Korinna Karampampa (KK), Sven Drefahl (SD), Tomas Andersson (TA), Anders Ahlbom (AA), and Karin Modig (KM), were involved in the conception and design of the study. KK and TA performed the analysis of the data. All authors (KK, SD, TA, AA, and KM) were involved in the interpretation of the results. KK and KM drafted the manuscript and all authors (including KK and KM) contributed with critical revisions to the contents of the manuscript. The final version of the manuscript was approved from all authors (KK, SD, TA, AA, and KM).

## ACKNOWLEDGEMENTS

This work was supported by a grant from the Swedish council for working life and social research [Forskningsrådet för arbetsliv och socialvetenskap, FAS] (grant number: 2011-0843). The regional ethics committee in Stockholm [Regionala etikprövningsnämnden i Stockholm, EPN] provided an approval for this study (Dnr 2011/136-31/5). There are no conflicts of interest in connection with this paper.

1  
2  
3 **REFERENCES**  
4

- 5 1. Vaupel JW, Zhang Z, van Raalte AA. Life expectancy and disparity: an international comparison  
6 of life table data. *BMJ Open* 2011;**1**(1):e000128 doi: 10.1136/bmjopen-2011-000128[published  
7 Online First: Epub Date]].  
8  
9  
10  
11 2. Oeppen J, Vaupel JW. Demography. Broken limits to life expectancy. *Science*  
12 2002;**296**(5570):1029-31 doi: 10.1126/science.1069675[published Online First: Epub Date]].  
13  
14  
15 3. Bronnum-Hansen H, Petersen I, Jeune B, Christensen K. Lifetime according to health status  
16 among the oldest olds in Denmark. *Age Ageing* 2009;**38**(1):47-51 doi:  
17 10.1093/ageing/afn239[published Online First: Epub Date]].  
18  
19  
20 4. Drefahl S, Lundstrom H, Modig K, Ahlbom A. The era of centenarians: mortality of the oldest  
21 old in Sweden. *J Intern Med* 2012;**272**(1):100-2 doi: 10.1111/j.1365-2796.2012.02518.x[published  
22 Online First: Epub Date]].  
23  
24  
25 5. Fries JF. Aging, natural death, and the compression of morbidity. *N Engl J Med*  
26 1980;**303**(3):130-5 doi: 10.1056/NEJM198007173030304[published Online First: Epub Date]].  
27  
28  
29 6. Olshansky SJ, Rudberg, M. A., Carnes, B. A., Cassel, B. A., & Brady, J.A. Trading off longer life  
30 for worsening health: The expansion of morbidity hypothesis. *Journal of Aging and Health*  
31 1991;**3**:194-216  
32  
33  
34 7. Robine JM, & Mathers, C. *Measuring the compression or expansion of morbidity through*  
35 *changes in health expectancy. In J.M. Robine, et al. Calculation of health expectancies,*  
36 *harmonization, consensus achieved and future perspectives (pp. 169-286). Paris: Libbey, 1993.*  
37  
38  
39 8. Larsson K, Thorslund M. Chapter 8: old people's health. *Scand J Public Health Suppl*  
40 2006;**67**:185-98 doi: 10.1080/14034950600677253[published Online First: Epub Date]].  
41  
42  
43 9. Modig K, Drefahl S, Andersson T, Ahlbom A. The aging population in Sweden: can declining  
44 incidence rates in MI, stroke and cancer counterbalance the future demographic challenges? *Eur J*  
45  
46  
47  
48  
49  
50  
51  
52  
53  
54  
55  
56  
57  
58  
59  
60



1  
2  
3 Epidemiol 2012;**27**(2):139-45 doi: 10.1007/s10654-012-9653-2[published Online First: Epub  
4 Date]].

5  
6  
7 10. Parker MG, Ahacic K, Thorslund M. Health changes among Swedish oldest old: prevalence  
8 rates from 1992 and 2002 show increasing health problems. J Gerontol A Biol Sci Med Sci  
9 2005;**60**(10):1351-5

10  
11  
12 11. Thorslund M and Parker MG. Hur mår egentligen de äldre? Lakartidningen, 2005.  
13 102(43):3119-24..

14  
15  
16 12. Crimmins EM, Beltran-Sanchez H. Mortality and morbidity trends: is there compression of  
17 morbidity? J Gerontol B Psychol Sci Soc Sci 2011;**66**(1):75-86 doi:  
18 10.1093/geronb/gbq088[published Online First: Epub Date]].

19  
20  
21 13. Carandang R, Seshadri S, Beiser A, et al. Trends in incidence, lifetime risk, severity, and 30-day  
22 mortality of stroke over the past 50 years. Jama 2006;**296**(24):2939-46 doi:  
23 10.1001/jama.296.24.2939[published Online First: Epub Date]].

24  
25  
26 14. Langa KM, Larson EB, Karlawish JH, et al. Trends in the prevalence and mortality of cognitive  
27 impairment in the United States: is there evidence of a compression of cognitive morbidity?  
28 Alzheimers Dement 2008;**4**(2):134-44 doi: 10.1016/j.jalz.2008.01.001[published Online First: Epub  
29 Date]].

30  
31  
32 15. Peeters A, Nusselder WJ, Stevenson C, Boyko EJ, Moon L, Tonkin A. Age-specific trends in  
33 cardiovascular mortality rates in the Netherlands between 1980 and 2009. Eur J Epidemiol  
34 2011;**26**(5):369-73 doi: 10.1007/s10654-011-9546-9[published Online First: Epub Date]].

35  
36  
37 16. Akushevich I, Kravchenko J, Ukraintseva S, Arbeev K, Yashin AI. Time trends of incidence of  
38 age-associated diseases in the US elderly population: medicare-based analysis. Age Ageing 2013  
39 doi: 10.1093/ageing/aft032[published Online First: Epub Date]].

40  
41  
42 17. Statistics Sweden [Statistiska centralbyrån]. Swedish Register of the Total Population [Registret  
43 över totalbefolkningen (RTB)]. Information available: [http://www.scb.se/Pages/List\\_257499.aspx](http://www.scb.se/Pages/List_257499.aspx).

- 1  
2  
3 18. Statistics Sweden [Statistiska centralbyrån]. Longitudinal Integration Database for Health  
4 Insurance and Labour Market Studies [Longitudinell integrationsdatabas för sjukförsäkrings- och  
5 arbetsmarknadsstudier] (LISA). Information available: [http://www.scb.se/Pages/List\\_257742.aspx](http://www.scb.se/Pages/List_257742.aspx)  
6  
7  
8  
9  
10 19. Socialstyrelsen [National Board of Health and Welfare]. National Inpatient Register  
11 [Patientregistret]. Information available:  
12 <http://www.socialstyrelsen.se/register/halsodataregister/patientregistret>.  
13  
14  
15  
16  
17 20. Socialstyrelsen [National Board of Health and Welfare]. Cause of Death Register  
18 [Dödsorsaksregistret]. Information available:  
19 <http://www.socialstyrelsen.se/register/dodsorsaksregistret>.  
20  
21  
22  
23 21. Socialstyrelsen [National Board of Health and Welfare]. Publications 2011. Hjärtinfarkter  
24 1987–2010 [Myocardial infarctions in Sweden ,1987–2010] Available:  
25 <http://www.socialstyrelsen.se/publikationer2011/2011-11-36>. Accessed: 05 September 2012.  
26  
27  
28  
29  
30 22. Sveriges kommuner och landsting. Från sjukhussäng till e-hälsa. Utvecklingstendenser inom  
31 hälso- och sjukvården. Stockholm: Sveriges kommuner och landsting., 2010.  
32  
33  
34  
35 23. Socialstyrelsen [National Board of Health and Welfare]. Publications 2012. Inpatient diseases in  
36 Sweden 1987–2010 [Sjukdomar i slutenvård 1987- 2010]. Secondary Inpatient diseases in Sweden  
37 1987–2010 [Sjukdomar i slutenvård 1987- 2010] Available:  
38 <http://www.socialstyrelsen.se/publikationer2012/2012-10-18> Accessed: 16 November 2012.  
39  
40  
41  
42  
43 24. Socialstyrelsen [National Board of Health and Welfare]. Publications 2012. Patientregistret för  
44 2010 ur ett DRG-perspektiv [National In-patient Care Register in 2010, from a DRG perspective].  
45 Available: <http://www.socialstyrelsen.se/publikationer2012/2012-5-25>. Accessed: 16 November  
46  
47  
48  
49  
50 2012.  
51  
52  
53 25. Organization for Economic Co-operation and Development (OECD). OECD statistics. OECD  
54 Health Data: Health care utilisation: *Average length of stay: in-patient care*. Available:  
55 <http://stats.oecd.org/> Accessed: 07 June 2013.  
56  
57  
58  
59  
60

1  
2  
3  
4  
5  
6  
7  
8  
9  
10  
11  
12  
13  
14  
15  
16  
17  
18  
19  
20  
21  
22  
23  
24  
25  
26  
27  
28  
29  
30  
31  
32  
33  
34  
35  
36  
37  
38  
39  
40  
41  
42  
43  
44  
45  
46  
47  
48  
49  
50  
51  
52  
53  
54  
55  
56  
57  
58  
59  
60

26. Oksuzyan A, Jeune B, Juel K, Vaupel JW, Christensen K. Changes in hospitalisation and surgical procedures among the oldest-old: a follow-up study of the entire Danish 1895 and 1905 cohorts from ages 85 to 99 years. *Age Ageing*. 2013 Mar 26. [Epub ahead of print]

For peer review only

## Figures

**Fig. 1** Description of study measures.

**Fig. 2** Distribution of all-cause mortality, (a) for men and (b) for women, for four calendar years, ages 60-100. Vertical lines present the remaining life expectancy, LE, at age 60 for the same calendar years.

**Fig. 3** Distribution of all-cause first hospital admission, (a) for men and (b) for women, for four calendar years, ages 60-100. Vertical lines present the time to first hospital admission after the age of 60 for the same calendar years.

**Fig. 4** Remaining life-expectancy (LE) and time to first admission to the hospital after the ages of 60, 70, 80, and 90, (a) for men and (b) for women.
